# Parallel Movement-suppressing Striatal Output Pathways

Qiaoling Cui<sup>1</sup>, Xixun Du<sup>1,2</sup>, Isaac Y. M. Chang<sup>1</sup>, Arin Pamukcu<sup>1</sup>, Varoth Lilascharoen<sup>3</sup>, Brianna L. Berceau<sup>1</sup>, Daniela García<sup>1</sup>, Darius Hong<sup>1</sup>, Uree Chon<sup>4</sup>, Ahana Narayanan<sup>1</sup>, Yongsoo Kim<sup>4</sup>, Byung Kook Lim<sup>3</sup>, C. Savio Chan<sup>1</sup>

<sup>1</sup> Department of Physiology, Feinberg School of Medicine, Northwestern University, Chicago, IL, USA

<sup>2</sup> Department of Physiology, Faculty of Medicine, Qingdao University, Qingdao, Shandong, China

<sup>3</sup> Neurobiology Section, Biological Sciences Division, University of California San Diego, La Jolla, CA, USA

<sup>4</sup> Department of Neural and Behavioral Sciences, College of Medicine, Penn State University, Hershey, PA, USA

Correspondence should be addressed to C. Savio Chan, Department of Physiology, Feinberg School of Medicine, Northwestern University, 303 East Chicago Avenue, Chicago, IL 60611. [saviochan@gmail.com](mailto:saviochan@gmail.com)

Running title: Parallel Striatopallidal Subcircuits

Keywords: GABAergic inhibition, body kinematics, movement dynamics; bradykinesia, arky pallidal neurons, 6-OHDA

## Acknowledgments

We would like to thank Saivasudha Chalasani, Alyssa Bebenek, Moises Melesio, and Coby Dodelson for their assistance, Dr. Tracy Gertler, Cooper Chan, and Cassidy Chan for supporting the completion of the fourth manuscript from the Chan Lab during the COVID-19 pandemic. This work was supported by NIH R01 NS069777 (CSC), R01 MH112768 (CSC), R01 NS097901 (CSC), R01 MH109466 (CSC), R01 NS088528 (CSC), R01 MH107742 (BL), R01 MH108594 (BL), U01 MH114829 (BKL), R01 MH116176 (YK), and T32 AG020506 (AP).

## Author contributions

QC conceived the study. QC and XD conducted the electrophysiological measurements. QC, IYMC, and AP performed the behavioral studies. QC, XD, BLB, DG, and AN performed histological analysis. VL and BL performed the rabies tracing. UC and YK performed the two-photon tomography. DH and AN assisted with data analyses. QC and CSC wrote the manuscript. CSC designed, directed, and supervised the project. All authors reviewed and edited the manuscript.

## Abstract (152 words)

The classic basal ganglia circuit model asserts a complete segregation of the two striatal output pathways. Empirical data argue that, in addition to indirect-pathway striatal projection neurons (iSPNs), direct-pathway striatal projection neurons (dSPNs) innervate the external globus pallidus (GPe). However, the functions of the latter were not known. In this study, we interrogated the organization principles of striatopallidal projections and how they are involved in full-body movement in mice (both males and females). In contrast to the canonical motor-promoting role of dSPNs in the dorsomedial striatum (<sup>DMS</sup>dSPNs), optogenetic stimulation of dSPNs in the dorsolateral striatum (<sup>DLS</sup>dSPNs) suppressed locomotion. Circuit analyses revealed that dSPNs selectively target Npas1<sup>+</sup> neurons in the GPe. In a chronic 6-hydroxydopamine lesion model of Parkinson's disease, the dSPN-Npas1<sup>+</sup> projection was dramatically strengthened. As <sup>DLS</sup>dSPN-Npas1<sup>+</sup> projection suppresses movement, the enhancement of this projection represents a circuit mechanism for the hypokinetic symptoms of Parkinson's disease that has not been previously considered.

## 15 Significance statement (102 words)

In the classic basal ganglia model, the striatum is described as a divergent structure—it controls motor and adaptive functions through two segregated, opponent output streams. However, the experimental results that show the projection from direct-pathway neurons to the external pallidum have been largely ignored. Here, we showed that this striatopallidal sub-pathway targets a select subset of neurons in the external pallidum and is motor-suppressing. We found that this sub-pathway undergoes plastic changes in a Parkinson's disease model. In particular, our results suggest that the increase in strength of this sub-pathway contributes to the slowness or reduced movements observed in Parkinson's disease.

## 25 Introduction (286 words)

The basal ganglia are a group of subcortical nuclei that are critically involved in action control. As the input station of the basal ganglia macrocircuit, the dorsal striatum (dStr) is capable of supporting a wide repertoire of innate behaviors, such as feeding, grooming, and locomotion (Albin et al., 1995; Mink, 1996; Graybiel, 2008; Redgrave et

al., 2010; Turner and Desmurget, 2010; Costa, 2011; Gerfen and Surmeier, 2011; Kravitz et al., 2012; Markowitz et  
30 al., 2018; Park et al., 2020; Weglage et al., 2020). While theories about action selection and suppression have been  
proposed, the precise cellular and circuit mechanisms involved remain to be determined. The classic circuit model  
asserts a complete segregation of the two striatal output pathways. On the other hand, empirical data argue that,  
in addition to indirect-pathway striatal projection neurons (iSPNs), direct-pathway striatal projection neurons  
(dSPNs) innervate the external globus pallidus (GPe). However, we only have limited information about the  
35 properties of the dSPN-GPe pathway. Previous investigations strongly suggest that the dSPN-GPe pathway  
shapes motor output (Cazorla et al., 2014). As the GPe contains a heterogenous population of neurons (Hernandez  
et al., 2015; Hegeman et al., 2016; Saunders et al., 2018; Abecassis et al., 2020; Cherian et al., 2020), the identity of  
neurons that receive dSPN input remains elusive. As we have established PV<sup>+</sup> neurons and Npas1<sup>+</sup> neurons in the  
GPe have distinct circuit and functional roles (Cherian et al., 2020; Pamukcu et al., 2020), we hypothesized that  
40 dSPNs regulate motor output by targeting a select subset of these neurons. Here, using transgenic and molecular  
tools, we dissected the cellular and spatial organization of the striatopallidal system; using *in vivo* optogenetics  
and machine-learning approaches, we studied the behavioral relevance of the striatopallidal subcircuits.

## 45 **Methods** (3673 words)

### **Mice**

All experiments detailed are in accord with the Northwestern University Animal Care and Use Committee, the  
Institutional Animal Care and Use Committee at the University of California, San Diego, and are in compliance with  
the NIH Guide for the Care and Use of Laboratory Animals. *Adora2a*<sup>Cre</sup> and *Drd1a*<sup>Cre</sup> were obtained from MMRRC  
50 (Gong et al., 2007). *Drd1a*<sup>tdTomato</sup> (Ade et al., 2011), *Pvalb*<sup>tdTomato</sup> (Kaiser et al., 2016), *Pvalb*<sup>Cre</sup> (Hippenmeyer et al.,  
2005), *R26*<sup>LSL-tdTomato</sup> (Madisen et al., 2010), *R26*<sup>FSF-LSL-tdTomato</sup> (Madisen et al., 2015), and *Tac1*<sup>Cre</sup> (Harris et al., 2014)  
were obtained from Jackson Laboratory. *Npas1*<sup>Cre-2A-tdTomato</sup> (hereafter referred to as *Npas1*<sup>Cre</sup>) was generated in-  
house (Hernandez et al., 2015). Mice for all experiments were maintained on a C57BL/6J (Jax 000664)  
background. Mice were group-housed in standard cages on a 12-hr light-dark cycle. Both male and female mice  
55 were used in this study. To minimize the potential alteration of the phenotypes in mice carrying the transgene  
alleles, only hemizygous or heterozygous mice were used.

## Virus and tracer injections

Stereotaxic injections were performed as previously described (Cui et al., 2016). In brief, mice were anesthetized  
60 with isoflurane and immobilized on a stereotaxic frame (David Kopf Instruments). A small craniotomy (~1 mm  
diameter) was made with a dental drill (Osada) for injection into a specific brain region. Virus or tracer was injected  
using a calibrated glass micropipette (VWR) at a rate of 0.3–0.5  $\mu$ l/min. The micropipette was left *in situ* for 5–10  
min post-injection to maximize tissue retention of virus or tracer and decrease capillary spread upon pipette  
withdrawal.

65 For optogenetic stimulation of direct-pathway striatal projection neurons (dSPNs) or indirect-pathway  
striatal projection neurons (iSPNs) in dorsomedial striatum (DMS) or dorsolateral striatum (DLS) used for *ex vivo*  
experiments, a total 360 nl of EF1 $\alpha$ -CreOn-hChR2(H134R)-eYFP adeno-associated virus (AAV) was injected  
unilaterally into the DMS (in mm: 0.9 rostral, 1.4 lateral, 3.4 and 3.0 ventral from bregma) or the DLS (in mm: 0.7  
rostral, 2.3 lateral, 3.4 and 3.0 ventral from bregma) of *Drd1a*<sup>Cre</sup> or *Adora2a*<sup>Cre</sup> mice. For *in vivo* optogenetic  
70 stimulation of SPN soma or terminal fields, EF1 $\alpha$ -CreOn-hChR2(H134R)-eYFP AAV was injected bilaterally into the  
DMS or DLS (540–720 nl per hemisphere). For control mice, EF1 $\alpha$ -CreOn-eYFP AAV was injected into the same  
region with the same viral volume. To suppress neurotransmitter release from PV<sup>+</sup> or Npas1<sup>+</sup> GPe neurons, 135 nl  
of a tetanus toxin light chain-expressing (EF1 $\alpha$ -CreOn-TeTLC-2A-eGFP) AAV was injected bilaterally into the  
external globus pallidus (GPe; in mm: 0.3 caudal, 2.0 lateral, 4.1 ventral from bregma) of *Pvalb*<sup>Cre</sup> and *Npas1*<sup>Cre</sup> mice,  
75 respectively. To visualize the projection targets of dSPNs or iSPNs, hSyn-Flex-mRuby2-T2A-Synaptophysin-eGFP  
AAV (360 nl) was unilaterally injected into the DLS or DMS of *Drd1a*<sup>Cre</sup>, *Tac1*<sup>Cre</sup>, or *Adora2a*<sup>Cre</sup> mice.

To determine whole-brain projections to the GPe, 90 nl of Cre-expressing lentivirus (LVretro-Cre) (Knowland  
et al., 2017) was mixed with cholera-toxin B subunit (CTb) conjugated to Alexa 488 (Thermo Fisher Scientific) at  
1:1 ratio and was injected into the GPe (in mm: 0.2–0.25 caudal, 2.1–2.2 lateral, 4.1 ventral from bregma) of *R26*<sup>LSL-</sup>  
80 <sup>tdTomato</sup> mice. For rabies-based retrograde tracing, 200 nl of CreOn-mRuby2-TVA-RVG AAV (Shin et al., 2018) was  
first injected unilaterally into the GPe (in mm: 0.35 caudal and 2.0 lateral from bregma, 3.5 ventral from dura) of  
*Pvalb*<sup>Cre</sup> and *Npas1*<sup>Cre</sup> mice followed by EnvA-RV $\Delta$ G-eGFP into the GPe three weeks later. To determine if single  
striatal neurons innervate both GPe and substantia nigra pars reticulata (SNr), 90 nl of CTb 488 and 180 nl of Alexa  
647-conjugated CTb (CTb 647; Thermo Fisher Scientific) were injected into the GPe (in mm: 0.2–0.25 caudal, 2.1–



85 2.2 lateral, 4.1 ventral from bregma) and the SNr (in mm: 2.65 caudal, 1.5 lateral, 4.65 ventral from bregma, and 3.0 caudal, 1.44 lateral, 4.5 ventral from bregma), respectively, of *Drd1a*<sup>tdTomato</sup> mice or *Tac1*<sup>Cre</sup> mice for examining the colocalization of two CTbs with tdTomato or Cre. Alternatively, a CreOn-Flp canine virus (CAV) and CTb 647 were injected into the SNr together with hSyn-CreOn-FlpOn-ChR2-eYFP AAV into the dStr of *Drd1a*<sup>Cre</sup> mice.

The locations of the targeted injections were visually inspected under epifluorescence microscopy in ex  
90  *vivo* slices or histologically verified *post hoc*. AAVs, LV, CAV, and rabies virus were used for this study. AAVs and LVs were injected into mice (postnatal day 28–35, and postnatal day 55, respectively) at a final titer of  $10^{12}$ – $10^{13}$  genome copies/ml, using the same standard procedures as stereotaxic injections (see above). CTbs were injected into mice at postnatal day 55–70. Recordings and immunohistological analyses were performed 28–40 days postoperatively. Fiber optic implantations were performed 21–35 days after viral injection. Fluorescence *in situ*  
95 hybridization was performed 1–2 weeks after the injection of rabies virus.

### Chronic 6-OHDA lesion

Unilateral lesion of the nigrostriatal system was produced by 6-hydroxydopamine HCl (6-OHDA) injection into the medial forebrain bundle (MFB) at postnatal day 28–35, as described previously (Cui et al., 2016). In brief, 6-OHDA  
100 (2.5–3 µg/µl) was dissolved in 0.9% (wt/vol) NaCl with 0.1% (wt/vol) ascorbic acid. Using identical procedures to those for stereotaxic injection of virus and tracer, 1 µl of 6-OHDA was injected into the MFB at (in mm) 0.70 caudal, 1.10 lateral, and 4.95 ventral from bregma. The extent of dopamine depletion was assessed using the cylinder test to quantify impairment in forelimb usage. Behavioral tests were carried out at 3–5 weeks after 6-OHDA lesion. Contacts made by each forepaw on the wall of a clear glass cylinder (9 cm diameter) during spontaneous  
105 exploratory behavior were counted during a five-minute period. The asymmetry of the forelimb usage was defined as independent contralateral paw placement relative to that of the ipsilateral (to the injection) paw against the walls of the chamber during rearing and vertical or lateral explorations. Mice with less than 20% contralateral paw touches were deemed with severe dopamine loss and were used for subsequent experiments. Electrophysiological experiments or immunohistological analyses were performed 4–6 weeks after 6-OHDA  
110 injection.

## Fiber implantation and behavior testing

Surgical procedures were the same as those for stereotaxic injections (see above). Fiber optic cannulae (250  $\mu\text{m}$  core diameter, 0.66 NA) (Prizmatix) were bilaterally implanted into the target regions: the DMS (in mm: 0.9 rostral, 1.4 lateral, 3.0 ventral from bregma), the DLS (in mm: 0.7 rostral, 2.3 lateral, 3.0 ventral from bregma), the GPe (in mm: 0.3 caudal, 2.1 lateral, 3.7 ventral from bregma), or the SNr (in mm: 2.7 caudal, 1.4 lateral, 4.4 ventral from bregma). The fiber optic cannulae had a maximal output power of 12–18 mW measured at the tip. Implants were secured to the skull with dental cement (Parkell). Mice were allowed to recover for 1–2 weeks before behavioral testing.

Motor behavior induced by optogenetic stimulation was assessed in an open field. Behavioral testing was performed between 3:00 P.M. and 8:00 P.M. On the first day, the mice were allowed to freely explore the open field area (28 cm  $\times$  28 cm) for 25 min. On the second day, the implanted fiber-optic cannulae were connected to a 470 nm LED (Prizmatix). Five minutes after the mouse was placed in the open field arena, light stimulus trains (5 ms pulses at 10 Hz for 10 s) were delivered every min. A total of 20 stimulus trains were given to each mouse. Mice were videotaped with an overhead camera. The central position of each mouse was tracked with ETHOVISION (Noldus). Data for distance traveled over time were extracted. The locations of the targeted implantations were histologically verified *post hoc*. The assessment of TeTLC silencing on motor behavior was identical to that on the first day.

## Behavioral tracking and classification

DeepLabCut (<https://github.com/DeepLabCut/>) (Mathis et al., 2018; Nath et al., 2019) was used for tracking body parts of mice in an open field arena. Eight body parts including the nose, ears, body center, side laterals (hip-joints), tail base, and tail end were labeled in top-down view videos. To create the training dataset, 1,674 distinct frames from 50 video recordings of open field behavior were manually annotated. We used MobileNetV2-1-based network (Mathis et al., 2019; Sandler et al., 2019) with default parameters. The network was trained and refined for five rounds using default multi-step learning rates. Each round consists of 240,000–1,000,000 iterations, and the default multi-step learning rates were used. This trained network has a test error of 1.13 pixels and a training error of 4.82 pixels. Predictions of X-Y coordinates were processed using a median filter with a rolling window of five frames before further analysis. This network was then used to analyze all videos in this study.

140 To categorize motor behavior, DeepLabCut tracking data were first calibrated; the pixel-to-cm conversion for each video was determined by comparing the width of the arena in pixels to the actual width of the arena (28 cm). Based on the calibrated X-Y coordinates of labeled body parts, a set of movement metrics was generated for each frame. Mouse speed was measured as the body center speed. Mouse width was measured as the euclidean distance between the side laterals, and mouse length was measured as the euclidean distance between the nose  
145 and the tail base. Locomotion was defined as frames when the body center had a speed  $> 0.5$  cm/s; motionless was defined as frames when ears, the body center, laterals, and the tail base all had a speed  $\leq 0.5$  cm/s. To classify rearing, we constructed a random forest classifier in SimBA. 19,058 rearing frames from 35 video recordings of open-field behavior were extracted and manually annotated as rearing by three independent annotators. Supported and unsupported rearing behaviors were not differentiated. The start frame was defined as the frame in which the  
150 mouse lifted its forelimbs off the floor and extended its head upwards; the end frame was defined as the frame before the forelimbs made contact with the floor. The model was built with the following settings: `n_estimators = 2,500`, `RF_criterion = entropy`, `RF_max_features = sqrt`, `RF_min_sample leaf = 2`, and no oversampling or undersampling. 20% of the video frames were used for testing and the other 80% were used for training. The resulting classifier has a F1-score = 0.71, precision = 0.68, and recall = 0.74. The performance of this classifier was  
155 on par with those reported recently (Nilsson et al., 2020). The discrimination threshold was set at  $Pr = 0.31$ , and each instance of rearing has a minimum duration of 300 ms. Lastly, fine movement was defined as frames that do not fall into any of the categories mentioned above (i.e., locomotion, motionless, or rearing). Finally, example videos and the trained model are available on Github (<https://github.com/saviochan/SimBA-OpenFieldArena>) and Zenodo (<https://zenodo.org/record/3964701#.XyB8yJ5KhPZ>). The data generated by the analysis pipeline were  
160 processed using custom Python Scripts. Codes are available online ([https://github.com/saviochan/Python-Scripts/tree/master/OpenFieldArena\\_Behavior](https://github.com/saviochan/Python-Scripts/tree/master/OpenFieldArena_Behavior)). Twenty-five different movement metrics were tracked. Event frequency, duration, and percent time spent were logged. Fold changes were calculated by dividing the movement metric during light-period by that in pre-period. 'Light-period' corresponds to 10 s of light delivery. 'Pre-period' and 'post-period' correspond to the 10 s epoch before and after light delivery, respectively.

165 To assess the relationship between the measured movement metrics, a correlation matrix was constructed from binned, time-series data. Rearing-motionless switch frequency and motionless-rearing switch frequency were excluded because of the low occurrence of events. Hierarchical clustering of movement metrics

was performed in ClustVis (<https://biit.cs.ut.ee/clustvis/>) (Metsalu and Vilo, 2015). Twenty-five movement metrics were included in the analysis. Mice with targeted optogenetic stimulation of <sup>DMS</sup>dSPNs, <sup>DMS</sup>iSPNs, <sup>DLS</sup>dSPNs and <sup>DLS</sup>iSPNs, were included. Both rows and columns were clustered using correlation distance and average linkage. Movement metrics were centered and scaled.

### Fluorescence *in situ* hybridization

Brains were rapidly extracted and flash-frozen with isopentane chilled with dry ice in 70% ethanol. Coronal brain sections (25  $\mu$ m) containing the dStr and the GPe were prepared on a cryostat (Leica). Brain sections were mounted directly onto glass slides and stored at  $-80^{\circ}\text{C}$  until further processed. Fluorescence *in situ* hybridization was conducted using commercial probes (Advanced Cell Diagnostics). Slides were fixed in 4% PFA for 15 min at  $4^{\circ}\text{C}$  and subsequently dehydrated for 5–10 min with a series of ethanol at room temperature. Sections were then incubated with a protease pretreat-IV solution for 30 min, and washed with PBS, before being incubated with probes for 2 h at  $40^{\circ}\text{C}$ . After washes, the signal was amplified by incubating tissue sections in amplification buffers at  $40^{\circ}\text{C}$ . After the final rinse, DAPI solution was applied to the sections. Slides were coverslipped and visualized with a confocal microscope (Olympus).

### Immunolabeling

Mice aged postnatal day 55–80 were anesthetized deeply with a ketamine-xylazine mixture and perfused transcardially first with 0.01 M phosphate-buffered saline (PBS) followed by fixative containing 4% (wt/vol) paraformaldehyde in PBS, pH 7.4. Brain tissue was then postfixed in the same fixative for 1–2 h at  $4^{\circ}\text{C}$ . Tissue blocks containing the dStr and the GPe were sectioned using a vibrating microtome (Leica Instrument) at a thickness of 60  $\mu$ m. Floating sections were blocked with 10% (vol/vol) normal goat or donkey serum (Gibco) and 0.1% (vol/vol) Triton X-100 in PBS for 30–60 min at room temperature and subsequently incubated with primary antibodies (**Table 1**) in the same solution for  $\sim 24$  h at  $4^{\circ}\text{C}$ . After washes in PBS, the sections were incubated with Alexa-conjugated IgG secondary antibodies at 1:500 (Life Technologies) for 2 h at room temperature. The sections were then washed, mounted, and coverslipped. Immunoreactivity was examined on a laser-scanning confocal microscope with a 10 $\times$  0.45 numerical aperture (NA) air objective and a 60 $\times$  1.35 NA oil-immersion objective (Olympus).

## Fiber density and synaptic contact quantifications

To measure fiber density of dSPNs in the dStr, GPe, and SNr, *Drd1a*<sup>Cre</sup> mice were injected with EF1 $\alpha$ -CreOn-hChR2(H134R)-eYFP AAV into the dStr. 60  $\mu$ m-thick sections from lateral, intermediate, and medial levels (approximately 2.5 mm, 2.1 mm, 1.7 mm lateral from bregma) were sampled. eYFP fluorescence was enhanced with an antibody (**Table 1**). 10 $\times$  images of YFP fluorescence in the dStr, GPe, and SNr were captured with a confocal microscope. Fiber density was estimated based on YFP fluorescence. Briefly, a region that encompasses the entirety of the dStr, GPe, or SNr with YFP fluorescence was selected. Lower and upper threshold values were set using a thresholding function in Fiji (Schindelin et al., 2012). Integrated density was then measured.

To visualize dSPN terminals within the GPe, the same tissue sections as those used for fiber density analysis were used. These sections were co-stained with antibodies for gephyrin and vesicular GABA transporter (VGAT) (**Table 1**). In each section, three z-stacks spanning across the entire rostrocaudal axis of the GPe were imaged with a confocal microscope (Olympus) using a 60 $\times$  objective with a 2 $\times$  digital zoom. Five consecutive optical sections (1  $\mu$ m interval) were captured for each z-stack. Quantification of putative synaptic contacts was performed with Fiji. The spatial relationship between labeled structures was examined across all three orthogonal planes. Synaptic contacts were deemed to be *bona fide* only if YFP<sup>+</sup> fibers were in close apposition with gephyrin<sup>+</sup> or VGAT<sup>+</sup> structures in all x-( $\leq 0.2 \mu$ m), y-( $\leq 0.2 \mu$ m), and z-( $\leq 1 \mu$ m) planes.

To compare density of terminals from dSPNs and iSPNs, tissue sections from *Drd1a*<sup>Cre</sup>, *Tac1*<sup>Cre</sup>, or *Adora2a*<sup>Cre</sup> mice injected with hSyn-Flex-mRuby2-T2A-Synaptophysin-eGFP AAV into the DLS or DMS were used. GFP fluorescence was enhanced with an antibody (**Table 1**). 60 $\times$  z-stack images of GFP fluorescence in the GPe were captured with a confocal microscope. Two regions of interest (ROIs) from dorsorostral and ventrocaudal territories of the GPe were imaged for each section. Integrated density from maximal projection image of ten optical planes was quantified using the same thresholding function as used for fiber density analysis.

## Serial two-photon tomography

Serial two-photon tomography was used to map inputs to the GPe from the entire brain. Imaging and analysis were performed as previously described (Kim et al., 2017; Abecassis et al., 2020). Two weeks after LVretro-Cre and CTb-488 injection, mouse brains were fixed as described above. Brains were then transferred to PBS and

stored at 4 °C until imaged. Brains were embedded in 4% agarose in 0.05 M phosphate buffer and cross-linked in  
225 0.2% sodium borohydrate solution (in PBS, pH 9.0–9.5). Each brain was imaged with a high-speed two-photon  
microscope with an integrated vibratome (TissueVision) at 1 µm at both x–y resolution with 280 z-sections in  
every 50 µm. A 910 nm two-photon laser (Coherent Technologies) was used for CTb488 and tdTomato excitation.  
A dichroic mirror (Chroma) and band-pass filters (Semrock) were used to separate green and red fluorescence  
signals. Emission signals were detected by GaAsP photomultiplier tubes (Hamamatsu). An automated, whole-  
230 brain cell counting and registration of the detected signal on a reference brain was applied as described before  
(Kim et al., 2017). The number of tdTomato neurons from each brain region was charted. The relative size of the  
input to the GPe was calculated by normalizing the total number of tdTomato neurons in the entire brain of each  
sample.

### 235 **Visualized recording in *ex vivo* brain slices**

Mice aged postnatal day 55–75 were anesthetized with a ketamine-xylazine mixture and perfused transcardially  
with ice-cold artificial cerebrospinal fluid (aCSF) containing (in mM): 125 NaCl, 2.5 KCl, 1.25 NaH<sub>2</sub>PO<sub>4</sub>, 2.0 CaCl<sub>2</sub>,  
1.0 MgCl<sub>2</sub>, 25 NaHCO<sub>3</sub>, and 12.5 glucose, bubbled continuously with carbogen (95% O<sub>2</sub> and 5% CO<sub>2</sub>). The brains  
were rapidly removed, glued to the stage of a vibrating microtome (Leica Instrument), and immersed in ice-cold  
240 aCSF. Parasagittal (for DLS-GPe) or sagittal (for DMS-GPe) *ex vivo* slices containing the dStr and the GPe were cut  
at a thickness of 240 µm and transferred to a holding chamber, where they were submerged in aCSF at 35 °C for  
30 min, and returned to room temperature before recording.

*Ex vivo* slices were then transferred to a small volume (~0.5 ml) Delrin recording chamber that was  
mounted on a fixed-stage, upright microscope (Olympus). Neurons were visualized using differential interference  
245 contrast optics (Olympus), illuminated at 735 nm (Thorlabs), imaged with a 60× 1.0 NA water-immersion objective  
(Olympus) and a CCD camera (QImaging). PV<sup>+</sup>, PV<sup>-</sup>, Npas1<sup>+</sup>, and Npas1<sup>-</sup> GPe neurons were identified by the  
presence or absence of somatic tdTomato fluorescence examined under epifluorescence microscopy with a  
daylight (6,500 K) LED (Thorlabs) and an appropriate filter cube (Semrock) from *Pvalb*<sup>tdTomato</sup> and *Npas1*<sup>Cre</sup>  
transgenic mice.

250 Recordings were made at room temperature (20–22 °C) with patch electrodes fabricated from capillary  
glass (Sutter Instruments) pulled on a Flaming-Brown puller (Sutter Instruments) and fire-polished with a

microforge (Narishige) immediately before use. Pipette resistance was typically ~3–5 M $\Omega$ . Internal solution for voltage-clamp recordings of inhibitory postsynaptic currents contained (in mM): 120 CsCl, 10 Na<sub>2</sub>phosphocreatine, 5 HEPES, 5 tetraethylammonium-Cl, 2 Mg<sub>2</sub>ATP, 1 QX314-Cl, 0.5 Na<sub>3</sub>GTP, 0.5 CaCl<sub>2</sub>, 0.25 EGTA, and 0.2% (wt/vol) biocytin, pH adjusted to 7.25–7.30 with CsOH. This internal solution had an osmolarity of ~290 mOsm. Somatic whole-cell patch-clamp recordings were obtained with an amplifier (Molecular Devices). The signal for voltage-clamp recordings was filtered at 1 kHz and digitized at 10 kHz with a digitizer (Molecular Devices). Stimulus generation and data acquisition were performed using pClamp (Molecular Devices).

For optogenetic experiments, blue (peak at ~450 nm) excitation wavelength from two daylight (6,500 K) LEDs (Thorlabs) was delivered to the tissue slice bidirectionally from both the 60 $\times$  water immersion objective and the 0.9 NA air condenser with the aid of 520 nm dichroic beamsplitters (Semrock). The field of illumination that centered around the recorded cells was ~500  $\mu$ m in diameter. The duration for all light pulses was 2 ms. All recordings were made in the presence of R-CPP (10  $\mu$ M) and NBQX (5  $\mu$ M) to prevent the confounding effects of incidental stimulation of glutamatergic inputs. CGP55845 (1  $\mu$ M) was also included to prevent GABA<sub>B</sub> receptor-mediated modulation. In a subset of experiments, 2–4 mM Sr<sup>2+</sup> was used to replace Ca<sup>2+</sup> to measure quantal events (Bekkers and Clements, 1999; Xu-Friedman and Regehr, 1999, 2000; McGarry and Carter, 2017).

Off-line data analyses were performed with ClampFit (Molecular Devices) and MiniAnalysis (Synaptosoft). Paired-pulse ratios were calculated by dividing the second inhibitory postsynaptic current (IPSC<sub>2</sub>) amplitude by the IPSC<sub>1</sub> amplitude (Kim and Alger, 2001). For strontium-based quantal analysis, quantal events within 300 ms after the striatal stimulation were quantified.

## Drugs

*R*-baclofen, *R*-CPP, LY341495, and NBQX disodium salt, were obtained from Tocris. CGP55845, QX314-Cl, and SR95531 were obtained from Abcam. Na<sub>3</sub>GTP and tetrodotoxin were from Roche and Alomone Laboratories, respectively. Other reagents not listed above were from Sigma-Aldrich. Drugs were dissolved as stock solutions in either water or DMSO and aliquoted and frozen at –30 °C prior to use. Each drug was diluted to the appropriate concentrations by adding to the perfusate immediately before the experiment. The final concentration of DMSO in the perfusate was < 0.1%.

## 280 **Statistical analyses**

General graphing and statistical analyses were performed with MATLAB (MathWorks), Prism (GraphPad), JASP (285 <https://jasp-stats.org>) and the R environment (<https://www.r-project.org>). Custom analysis codes are available on GitHub (<https://github.com/chanlab>). Sample size ( $n$  value) is defined by the number of observations (i.e., ROIs, synaptic contacts, neurons, sections, or mice). When percentages are presented,  $n$  values represent only positive observations. No statistical method was used to predetermine sample size. Data in the main text are presented as median values  $\pm$  median absolute deviations (MADs) (Leys et al., 2013) as measures of central tendency and statistical dispersion, respectively. Box plots are used for graphic representation of population data unless stated otherwise (Krzywinski and Altman, 2014; Streit and Gehlenborg, 2014; Nuzzo, 2016). The central line represents the median, the box edges represent the interquartile ranges, and the whiskers represent 10–90th percentiles. 290 Normal distributions of data were not assumed. Individual data points were visualized for small sizes or to emphasize variability in the datasets. Non-parametric statistics were used throughout. Comparisons for unrelated samples were performed using a Mann–Whitney  $U$  test. The Wilcoxon signed rank test was used for pairwise comparisons for related samples. The Fisher's exact test was used for categorical data. The Spearman exact test was used for evaluating correlation between variables. Unless  $< 0.0001$  or  $> 0.99$ , exact  $P$  values (two-tailed) are 295 reported in the text. To avoid arbitrary cutoffs and visual clutter, levels of significance are not included in the figures.

## **Results** (3846 words)

### 300 **dSPNs send terminating axons to the GPe**

To examine the organization of the striatopallidal projection, two retrograde tracers, namely a Cre-expressing lentivirus (LVretro-Cre) (Knowland et al., 2017; Abecassis et al., 2020) and CTb 488 were co-injected into the GPe of a Cre-reporter ( $R26^{\text{LSL-tdTomato}}$ ) mouse. As expected, tdTomato<sup>+</sup> and CTb 488<sup>+</sup> neurons were readily observed in the dStr, thus confirming that dStr neurons project to the GPe (**Figure 1a**) and critically, cross-validating the utility 305 of the retrograde labeling strategy. Using serial two-photon tomography, whole-brain inputs to the GPe were mapped (Kim et al., 2017; Abecassis et al., 2020). As shown in **Figure 1a**, the dStr provides the largest input to the GPe. The number of input neurons (i.e., tdTomato<sup>+</sup>) from the dStr was at least an order of magnitude larger than



that from other brain regions charted, constituting  $\sim 80\%$  ( $79.0 \pm 3.1\%$ ) of total neurons ( $n = 45,223$  neurons, 8 mice) that projected to the GPe. This observation is consistent with the earlier finding that GABAergic synapses amount to over 80% of all synapses in the GPe (Kita, 2007).

To study the innervation of the GPe by dSPNs and iSPNs, *Drd1a<sup>Cre</sup>* and *Adora2a<sup>Cre</sup>* mice (Gerfen et al., 2013) were used, respectively. The arborization patterns and marker expression of the axons produced by Cre-expressing dStr neurons confirmed the validity of these two transgenic lines (**Figure 2a & b**). Moreover, *ex vivo* recordings showed that dopamine D2 receptors selectively regulate striatopallidal GABA release from iSPN (*Adora2a<sup>Cre</sup>*) but not dSPN (*Drd1a<sup>Cre</sup>*) input (**Figure 2c & d**). To determine the innervation density of SPN subtypes, we used a Cre-inducible adeno-associated virus (AAV) that tagged transduced neurons and their axonal terminals with mRuby2 and GFP, respectively (Knowland et al., 2017; Faget et al., 2018). As expected, GFP<sup>+</sup> puncta produced by SPNs were abundant in the GPe (**Figure 1b**). These GFP<sup>+</sup> puncta correspond to GABAergic terminals, as demonstrated by their immunoreactivity for vesicular GABA transporter (VGAT) and gephyrin (**Figure 1b**). The abundance of GFP<sup>+</sup> puncta was thus used as a measure of innervation density. The density of GFP<sup>+</sup> puncta formed by iSPNs were about seven-fold higher than that formed by dSPNs (*Adora2a<sup>Cre</sup>* =  $5.2 \pm 1.5 \times 10^7$  a.u.,  $n = 12$  ROIs; *Drd1a<sup>Cre</sup>* =  $0.7 \pm 0.3 \times 10^7$  a.u.,  $n = 10$  ROIs;  $P < 0.0001$ ) (**Figure 1b**).

To study whether single dSPNs innervate both the GPe and substantia nigra pars reticulata (SNr), two different retrograde tracers (i.e., CTb 488 and CTb 647) were injected into the GPe and SNr, respectively. Using *Drd1a<sup>tdTomato</sup>* mice to identify all dSPNs (Ade et al., 2011), we found that CTb 488 and CTb 647 signals were detected in the same tdTomato<sup>+</sup> neurons within the dStr (**Figure 1c**). Using an intersectional approach (with *Drd1a<sup>Cre</sup>* mice and a Flp-expressing retrograde virus) to confer an unparalleled spatial and genetic specificity, we observed axonal collateralization in the GPe from SNr-projecting, *Drd1a<sup>Cre+</sup>* dStr neurons (**Figure 1d**). These findings confirmed the earlier observations from single-cell tracing studies that show SNr-projecting dStr neurons (i.e. dSPNs) arborize within the GPe (Kawaguchi et al., 1990; Wu et al., 2000; Levesque and Parent, 2005; Fujiyama et al., 2011).

Although the results obtained from *Drd1a<sup>Cre</sup>* and *Drd1a<sup>tdTomato</sup>* mice were consistent with each other, as they are both bacterial artificial chromosome transgenic mice and were derived from the single parent construct (Gerfen et al., 2013), *Tac1<sup>Cre</sup>* knock-in mice were employed to confirm the inferences drawn from *Drd1a<sup>Cre</sup>* and *Drd1a<sup>tdTomato</sup>* mice. Using the same synapse-tagging approach and CTb-based tracing mentioned above, we corroborated these findings (GFP<sup>+</sup> puncta density =  $1.0 \pm 0.5 \times 10^7$  a.u.,  $n = 12$  ROIs).

## dSPNs from discrete spatial domains project to the GPe

The dStr is divided into molecularly, synaptically, and functionally distinct subregions (Smith et al., 2004; Darvas and Palmiter, 2009, 2010; Nambu, 2011; Hintiryan et al., 2016; Hooks et al., 2018; Poulin et al., 2018; Martin et al., 340 2019; Alegre-Cortés et al., 2020; Ortiz et al., 2020). The dorsomedial striatum (DMS) and dorsolateral striatum (DLS) are thought to be involved in regulating goal-directed and habitual behavior, respectively (Yin and Knowlton, 2006; Balleine and O'Doherty, 2010; Redgrave et al., 2010; Cox and Witten, 2019). Although the role of DMS in locomotion is consistently observed across studies (Kravitz et al., 2010; Durieux et al., 2012; Cui et al., 2013; Freeze et al., 2013; Cazorla et al., 2014), the findings are counterintuitive, as this region of the dStr receives primarily non- 345 motor cortical input (McGeorge and Faull, 1989; Flaherty and Graybiel, 1994; Znamenskiy and Zador, 2013; Oh et al., 2014; Hintiryan et al., 2016; Hunnicutt et al., 2016; Hooks et al., 2018; Chon et al., 2019). On the other hand, while the DLS receives inputs from premotor and motor regions, recent studies argue that it is not involved in locomotion but is required for gradual motor skill acquisition (Yin and Knowlton, 2006; Nambu, 2011; Durieux et al., 2012; Rothwell et al., 2014; O'Hare et al., 2016; Malvaez and Wassum, 2018). As different approaches are used 350 across studies, we sought to examine the role of SPNs from the two spatial domains in controlling motor behavior using a systematic approach.

We first examined the anatomical organization of the striatal projections from the DMS and DLS. To study the dSPN and iSPN projections to the GPe, axonal terminals from dSPNs or iSPNs were selectively tagged using the synapse tagging approach (with synaptophysin-eGFP) described above. As expected from earlier observations 355 (Hedreen and DeLong, 1991; Deniau et al., 1996; Romanelli et al., 2005; Nambu, 2011; Bertino et al., 2020), both dSPNs and iSPNs from the DMS and DLS projected to downstream targets in a topographical manner (not shown). The innervation density of iSPN projection from the DMS and DLS, as measured by the abundance of GFP<sup>+</sup> puncta, were statistically indistinguishable (*Adora2a*<sup>Cre</sup>: DMS =  $5.2 \pm 0.7 \times 10^7$  a.u.,  $n = 6$  ROIs; DLS =  $5.1 \pm 1.7 \times 10^7$  a.u.,  $n = 6$  ROIs;  $P = 0.94$ ) (**Figure 2d & e**). The dSPN projection estimated with *Drd1a*<sup>Cre</sup> was organized similarly (*Drd1a*<sup>Cre</sup>: 360 DMS =  $0.7 \pm 0.2 \times 10^7$  a.u.,  $n = 4$  ROIs; DLS =  $0.7 \pm 0.2 \times 10^7$  a.u.,  $n = 6$  ROIs;  $P = 0.91$ ) (**Figure 2d & e**). Using *Tac1*<sup>Cre</sup> to estimate the dSPN projection to the GPe, we found a stronger projection from the DMS than DLS (*Tac1*<sup>Cre</sup>: DMS =  $1.4 \pm 0.5 \times 10^7$  a.u.,  $n = 6$  ROIs; DLS =  $0.7 \pm 0.3 \times 10^7$  a.u.,  $n = 6$  ROIs;  $P = 0.041$ ) (**Figure 2d & e**). We do not currently

have an explanation for the difference observed between *Drd1a*<sup>Cre</sup> and *Tac1*<sup>Cre</sup> mice; it is possible that these two lines have differences in the striosome-matrix bias.

365

### <sup>DLS</sup>dSPNs are motor-suppressing

To study the roles of SPN subtypes from the DMS and DLS in motor regulation, we first selectively stimulated <sup>DMS</sup>dSPNs and <sup>DMS</sup>iSPNs using Chr2, an excitatory opsin (Boyden et al., 2005), as a proof of concept. Consistent with the findings from prior studies (Kravitz et al., 2010; Durieux et al., 2012; Freeze et al., 2013), stimulation of <sup>DMS</sup>dSPNs and <sup>DMS</sup>iSPNs led to the canonical movement promotion and suppression, respectively, as measured by the change in average speed in an open-field (<sup>DMS</sup>dSPNs = +0.71 ± 0.28 fold, *n* = 9 mice, *P* = 0.0039; <sup>DMS</sup>iSPNs = -0.43 ± 0.05 fold, *n* = 11 mice, *P* = 0.00098). On the contrary, optogenetic stimulation of <sup>DLS</sup>dSPNs and <sup>DLS</sup>iSPNs suppressed and promoted movement, respectively (<sup>DLS</sup>dSPNs = -0.34 ± 0.24 fold, *n* = 13 mice, *P* = 0.0017; <sup>DLS</sup>iSPNs = +0.38 ± 0.31 fold, *n* = 15 mice, *P* = 0.00061). The motor effects were different from their corresponding eYFP controls (not shown), arguing that the findings were not artifacts of light delivery (Owen et al., 2019). By interrogating with optogenetic approaches, here we conclude that striatal spatial subdomains exhibit divergent locomotor regulation.

To survey the full range of motor behaviors, a machine learning approach was used to track body kinematics and movement dynamics (Cherian et al., 2020). These data are summarized in a heatmap format (Figure 3a). By performing a hierarchical clustering of movement metrics, we showed that the optogenetic stimulation of <sup>DMS</sup>dSPNs and <sup>DMS</sup>iSPNs induced congruent changes in motor behaviors across all mice examined—mice with targeted optogenetic stimulation of <sup>DMS</sup>dSPNs and <sup>DMS</sup>iSPNs fell into distinct clusters. On the contrary, mice with targeted optogenetic stimulation of <sup>DLS</sup>dSPNs and <sup>DLS</sup>iSPNs were intermixed with the two main clusters formed by mice that were targeted for optogenetic stimulation of <sup>DMS</sup>dSPNs and <sup>DMS</sup>iSPNs. The different motor patterns induced by selective stimulation of specific SPNs can be readily observed when ‘motionless’, ‘fine movement’, ‘rearing’, and ‘locomotion’ are charted (Figure 3b & c).

In particular, the data from <sup>DMS</sup>dSPNs and <sup>DMS</sup>iSPNs are the most intuitive. Consistent with the well-established roles of <sup>DMS</sup>dSPNs and <sup>DMS</sup>iSPNs, optogenetic stimulation of <sup>DMS</sup>dSPNs and <sup>DMS</sup>iSPNs led to coordinated changes in motionless and locomotion. On the contrary, the changes induced by optogenetic stimulation of <sup>DLS</sup>dSPNs and <sup>DLS</sup>iSPNs resulted in less marked or coherent changes in motionless and locomotion;

390

the changes in net motor output as measured with the distance traveled were primarily driven by the changes in movement speed. In addition, fine movement was increased with <sup>DLS</sup>dSPNs stimulation while decreased with <sup>DLS</sup>iSPNs stimulation. The differences in the movement dynamics induced with optogenetic stimulation of SPN subtypes can be found in **Table 2**. Lastly, the uniqueness of each SPN population in the induced motor behavior 395 is more clearly illustrated in the correlation matrix and principal component analysis of movement metrics (**Figure 3d & e**).

In summary, these findings are consistent with the idea that the striatum is involved in controlling complex body kinematics and a wide repertoire of innate complex behaviors (Turner and Anderson, 1997; Turner et al., 1998; Graybiel, 2008; Desmurget and Turner, 2010; Redgrave et al., 2010; Jin et al., 2014; Rueda-Orozco and Robbe, 400 2015; Ahmari, 2016; Barbera et al., 2016; Klaus et al., 2017; Markowitz et al., 2018; Fobbs et al., 2020; Park et al., 2020; Weglage et al., 2020).

### <sup>DLS</sup>dSPN-mediated motor suppression involves the GPe

Given the similar anatomical arrangements between the DMS and DLS, these results were not expected. To 405 understand the circuit basis that accounts for <sup>DLS</sup>dSPN-mediated movement suppression, we first optogenetically stimulated terminals of <sup>DLS</sup>dSPNs in their main projection target, i.e., the SNr. Consistent with the motor effect of <sup>DLS</sup>dSPNs, optogenetic stimulation of their terminals in the lateral SNr led to movement suppression ( $-0.42 \pm 0.14$  fold,  $n = 7$  mice,  $P = 0.016$ ). As expected, this effect was opposite to the movement promotion induced with stimulation of <sup>DMS</sup>dSPN terminals in the medial SNr ( $+0.68 \pm 0.32$  fold,  $n = 6$  mice,  $P = 0.031$ ). Similar to the findings 410 with stimulation of <sup>DLS</sup>dSPNs and their terminals in the lateral SNr, optogenetic stimulation of their terminals within the GPe produced motor suppression ( $-0.34 \pm 0.21$  fold,  $n = 16$  mice,  $P = 0.00021$ ) (**Figure 4d**). The effect was different ( $P = 0.0046$ ) from mice in which no ChR2 (i.e., eYFP only) was expressed ( $+0.01 \pm 0.07$  fold,  $n = 6$  mice,  $P > 0.99$ ). The fold changes were indistinguishable between stimulation of soma and their terminals in the GPe ( $P = 0.88$ ) (**Figure 4e**).

415 As action potentials propagate (both orthodromically and antidromically), it can be difficult to pinpoint the precise effector loci with ChR2-mediated stimulation. To unequivocally demonstrate the involvement of the GPe in mediating the downstream effects of <sup>DLS</sup>dSPNs, tetanus toxin light chain (TeTLC) was expressed selectively in PV<sup>+</sup> neurons or Npas1<sup>+</sup> neurons to silence their neurotransmitter release (Yamamoto et al., 2003; Murray et al.,

2011; Xu and Sudhof, 2013; Cui et al., 2016) (**Figure 4a, c, & e**). Consistent with the motor-suppressing role of  
420  $Npas1^+$  neurons (Glajch et al., 2016; Pamukcu et al., 2020), silencing of  $Npas1^+$  neurons with TeTLC increased  
locomotion compared to mice that only expressed eYFP in  $Npas1^+$  neurons (control =  $57.4 \pm 1.0$  m,  $n = 8$  mice;  
TeTLC =  $77.1 \pm 8.6$  m,  $n = 11$  mice;  $P = 0.0050$ ) (**Figure 4b**). In mice with  $Npas1^+$  neurons silenced, stimulation of  
 $DLS$  dSPN axons in the GPe did not result in the expected movement suppression ( $-0.06 \pm 0.09$  fold,  $n = 10$  mice,  $P$   
= 0.32) (**Figure 4d & e**). In contrast, silencing of  $PV^+$  neurons led to movement suppression when  $DLS$  dSPN axons  
425 were stimulated ( $-0.20 \pm 0.12$  fold,  $n = 11$  mice,  $P = 0.0068$ ); this effect was statistically indistinguishable from that  
without  $PV^+$  neuron silencing ( $n = 16$  mice,  $P = 0.080$ ) (**Figure 4d & e**).

### $DLS$ dSPNs strongly target $Npas1^+$ neurons

The *in vivo* behavioral experiments indicate that  $Npas1^+$  neurons mediated the movement-suppressing effect of  
430  $DLS$  dSPNs, suggesting that  $DLS$  dSPNs selectively target  $Npas1^+$  neurons. To determine the connectivity pattern of  
striatopallidal projections, we first used rabies-mediated tracing (Hunt et al., 2018; Shin et al., 2018). Among all  
SPNs that were retrogradely labeled from  $PV^+$  neurons, a larger fraction were positive for *Drd2* mRNA than for  
*Drd1a* mRNA (*Drd1a* =  $40.7 \pm 3.1\%$ , *Drd2* =  $59.3 \pm 3.1\%$ ,  $n = 5$  mice) (**Figure 5a & c**). In contrast, among all SPNs  
that were retrogradely labeled from  $Npas1^+$  neurons, around two-thirds were positive for *Drd1a* mRNA (*Drd1a* =  
435  $66.4 \pm 0.6\%$ , *Drd2* =  $33.6 \pm 0.6\%$ ,  $n = 5$  mice) (**Figure 5a & c**); this connectivity pattern was different from the relative  
abundance of *Drd1a*- or *Drd2*-expressing SPNs that project to the  $PV^+$  neurons ( $P < 0.0001$ ).

The anatomical data showed a biased connectivity pattern where  $PV^+$  neurons and  $Npas1^+$  neurons are  
preferentially innervated by iSPNs and dSPNs, respectively. However, we were precluded from interrogating the  
spatial organization of the striatopallidal subcircuits with rabies-tracing, as the GPe is relatively small. Instead, we  
440 performed *ex vivo* patch-clamp recordings in identified GPe neurons. The size of optogenetically evoked inhibitory  
postsynaptic currents (IPSCs) was used as a measure of connection strength. The strength of  $DLS$  dSPN input to  
 $PV^+$  neurons was smaller than that to  $Npas1^+$  neurons. This difference was consistently observed across a large  
range of stimulus intensities ( $5.1$ – $56.7$  mW/mm<sup>2</sup>) (IPSC<sub>max</sub>:  $PV^+$  =  $38.5 \pm 29.3$  pA,  $n = 8$  neurons;  $Npas1^+$  =  $213.8 \pm$   
 $122.0$  pA,  $n = 28$  neurons;  $P = 0.00011$ ) (**Figure 5b & c**). These electrophysiological and anatomical data collectively  
445 argue that  $DLS$  dSPNs targeted  $Npas1^+$  neurons over  $PV^+$  neurons.

Our rabies-tracing data suggest that iSPNs preferentially innervate PV<sup>+</sup> neurons. Here we asked whether <sup>DLS</sup>iSPNs differentially target PV<sup>+</sup> neurons versus Npas1<sup>+</sup> neurons. As shown in **Figure 5b & c**, PV<sup>+</sup> neurons received stronger iSPN input compared to Npas1<sup>+</sup> neurons; this difference was observed across a wide range of stimulus intensities (2.4–56.7 mW/mm<sup>2</sup>) tested (IPSCs<sub>max</sub>: PV<sup>+</sup> = 1,740.7 ± 627.7 pA, *n* = 12 neurons; Npas1<sup>+</sup> = 76.9 ± 60.9 pA, *n* = 20 neurons; *P* < 0.0001). Among all individual DLS inputs examined, <sup>DLS</sup>iSPN-PV<sup>+</sup> input was the strongest. In summary, our data altogether indicate that <sup>DLS</sup>iSPNs preferentially target PV<sup>+</sup> neurons. A full description of the input-output relationship for distinct DLS inputs is summarized in **Table 3**.

Consistent with the differences in <sup>DLS</sup>dSPN input between PV<sup>+</sup> neurons and Npas1<sup>+</sup> neurons, optogenetic stimulation of <sup>DLS</sup>dSPNs only modestly decreased the firing of PV<sup>+</sup> neurons, but strongly suppressed the firing of Npas1<sup>+</sup> neurons (PV<sup>+</sup> = -0.19 ± 0.21 fold, *n* = 9 neurons, *P* = 0.027; Npas1<sup>+</sup> = -0.73 ± 0.23 fold, *n* = 11 neurons, *P* = 0.00098) (**Figure 5d**); the effects were different between PV<sup>+</sup> neurons and Npas1<sup>+</sup> neurons (*P* = 0.020). On the other hand, although there was a big difference in the strength of the <sup>DLS</sup>iSPN input between PV<sup>+</sup> neurons and Npas1<sup>+</sup> neurons, we did not observe a difference (*P* = 0.083) in the fold change of firing between PV<sup>+</sup> neurons and Npas1<sup>+</sup> neurons from <sup>DLS</sup>iSPN stimulation (PV<sup>+</sup> = -0.93 ± 0.06 fold, *n* = 9 neurons, *P* = 0.0039; Npas1<sup>+</sup> = -0.55 ± 0.27 fold, *n* = 11 neurons, *P* = 0.0020) (**Figure 5d**). Given the higher input resistance of Npas1<sup>+</sup> neurons (Hernandez et al., 2015), it is not surprising to see that a weak <sup>DLS</sup>iSPN input to Npas1<sup>+</sup> neurons suppressed firing disproportionately. The GABAergic nature of the <sup>DLS</sup>dSPN input was confirmed in a subset of Npas1<sup>+</sup> neurons. Similarly, in all PV<sup>+</sup> neurons tested (*n* = 5 neurons), the application of SR95531 completely blocked the <sup>DLS</sup>iSPN IPSCs, confirming the GABAergic nature of the synapse (**Figure 6f**).

465

### DMS and DLS inputs share a similar organization

So far, we have shown that <sup>DLS</sup>dSPNs and <sup>DLS</sup>iSPNs preferentially innervate Npas1<sup>+</sup> neurons and PV<sup>+</sup> neurons, respectively. While there are subtle spatial distributions of neuron subtypes in the GPe (Mastro et al., 2014; Abdi et al., 2015; Hernandez et al., 2015; Abecassis et al., 2020), their relationship with striatopallidal projections was not known. To this end, we asked whether <sup>DMS</sup>dSPNs have different connectivity with PV<sup>+</sup> neurons and Npas1<sup>+</sup> neurons compared to <sup>DLS</sup>dSPN input. Similar to <sup>DLS</sup>dSPNs that preferentially target Npas1<sup>+</sup> neurons, <sup>DMS</sup>dSPNs provided a stronger input to Npas1<sup>+</sup> neurons compared to PV<sup>+</sup> neurons, regardless of the stimulus intensity examined (**Figure 6e**). In addition, <sup>DMS</sup>iSPNs had a stronger input to PV<sup>+</sup> neurons than Npas1<sup>+</sup> neurons (**Figure 6e**). DMS inputs shared

a similar organization with DLS inputs (**Figure 6e**). A complete description of the input-output relationship for  
475 distinct DMS inputs is listed in **Table 4**.

To ascertain selective recruitment of striatal input from unique spatial domain, all data so far were obtained from somatic stimulation of SPNs (either within the DMS or DLS). Although the slicing angle was chosen to maintain maximal dStr-GPe connectivity, some axons were inevitably severed. To ensure our observations were not confounded by axonal preservation, we recorded synaptic responses with full-field stimulation of SPN  
480 terminals in the GPe. As shown in **Figure 6e**, this approach yielded results that were highly concordant with that obtained from somatic stimulation. The spatial specificity of the stimulation was confirmed with sequential applications of tetrodotoxin (TTX, a voltage-gated sodium channel blocker) and 4-aminopyridine (4-AP, a voltage-gated potassium channel blocker) (Petreanu et al., 2009). Although IPSCs were abolished with TTX for both somatic (i.e., intrastriatal) and axonal (i.e., intrapallidal) stimulation, subsequent co-application of TTX with 4-AP  
485 selectively restored the IPSCs with terminal stimulation. These results thus confirmed that somatic stimulation, but not terminal stimulation, involved conducting events (**Figure 6g**). In sum, dSPNs from both DLS and DMS preferentially target Npas1<sup>+</sup> neurons; whereas iSPNs from both spatial domains preferentially target PV<sup>+</sup> neurons.

### The dSPN-GPe innervation is selectively strengthened in a chronic PD model

490 Both circuit model and experimental data converge on the idea that an increased striatopallidal input contributes to the aberrant activity in the GPe in PD (Albin et al., 1989; Wichmann and DeLong, 2003; Walters et al., 2007; Ballion et al., 2009; Kita and Kita, 2011a, b; Lemos et al., 2016; Ryan et al., 2018; McIver et al., 2019). Our previous study demonstrated that total striatal input in unidentified GPe neurons increased following chronic 6-OHDA lesion (Cui et al., 2016). However, the alterations of individual striatopallidal subcircuit (i.e. dSPN-PV<sup>+</sup>, dSPN-Npas1<sup>+</sup>, iSPN-  
495 PV<sup>+</sup>, iSPN-Npas1<sup>+</sup>) were unknown. We therefore examined the alterations in the input-output relationship of these subcircuits in the chronic 6-OHDA lesion model of PD. <sup>DLS</sup>dSPN-Npas1<sup>+</sup> input was dramatically strengthened across all the stimulus intensities tested (IPSCs<sub>max</sub>: Npas1<sup>+</sup><sub>naïve</sub> = 213.8 ± 122.0 pA, *n* = 28 neurons; Npas1<sup>+</sup><sub>6-OHDA</sub> = 815.8 ± 530.5 pA, *n* = 15 neurons; *P* = 0.0017) (**Figure 6d & e**). In contrast, <sup>DLS</sup>dSPN-PV<sup>+</sup> input was not consistently altered across all stimulus intensities tested (IPSCs<sub>max</sub>: PV<sup>+</sup><sub>naïve</sub> = 38.5 ± 29.3 pA, *n* = 8 neurons; PV<sup>+</sup><sub>6-OHDA</sub> = 81.0 ±  
500 76.7 pA, *n* = 13 neurons; *P* = 0.14) (**Figure 6d & e**). To our surprise, given a predicted increase in iSPN input with the classic circuit model (Albin et al., 1989; Wichmann and DeLong, 2003), neither <sup>DLS</sup>iSPN-PV<sup>+</sup> input nor <sup>DLS</sup>iSPN-



Npas1<sup>+</sup> input was altered regardless of the stimulus location or stimulus intensity examined (IPSCs<sub>max</sub>: PV<sup>+</sup><sub>naïve</sub> = 1,740.7 ± 627.7 pA, *n* = 12 neurons; PV<sup>+</sup><sub>6-OHDA</sub> = 1,682.0 ± 820.4 pA, *n* = 18 neurons; *P* = 0.75; Npas1<sup>+</sup><sub>naïve</sub> = 76.9 ± 60.9 pA, *n* = 20 neurons; Npas1<sup>+</sup><sub>6-OHDA</sub> = 39.2 ± 22.2 pA, *n* = 11 neurons; *P* = 0.36) (**Figure 6e**). DMS inputs were  
505 similarly altered in the chronic 6-OHDA lesioned mice. <sup>DMS</sup>dSPN-Npas1<sup>+</sup> input was strengthened while no consistent change was detected for <sup>DMS</sup>iSPN-PV<sup>+</sup> input and <sup>DMS</sup>iSPN-Npas1<sup>+</sup> input (**Figure 6e**). As in naïve mice, our findings from 6-OHDA lesioned mice were consistent across the dStr subregions examined; dSPN inputs were biased toward Npas1<sup>+</sup> neurons while iSPN inputs were biased toward PV<sup>+</sup> neurons following chronic 6-OHDA lesion (**Figure 6e**). A full description of the input-output relationship for distinct striatal inputs is summarized in  
510 **Table 3 & 4**.

We hypothesize that the selective increase in the connection strength of the dSPN-Npas1<sup>+</sup> input is a result of increased innervation. To test this idea, we measured the density of axons produced by dSPNs in naïve and 6-OHDA lesioned mice. To visualize dSPN axons, Cre-inducible ChR2-eYFP was expressed in *Drd1a*<sup>Cre</sup> mice. We observed a dramatic increase in the dSPN axonal density in the GPe following 6-OHDA lesion (+2.64 ± 0.88 fold;  
515 *n*<sub>naïve</sub> = 7 sections, 4 mice; *n*<sub>6-OHDA</sub> = 12 sections, 6 mice; *P* = 0.00048) (**Figure 6a & c**), whereas only modest increases were observed in the dStr (+0.50 ± 0.22 fold; *n*<sub>naïve</sub> = 12 sections, 4 mice; *n*<sub>6-OHDA</sub> = 18 sections, 6 mice; *P* = 0.0050) and SNr (+0.57 ± 0.60 fold; *n*<sub>naïve</sub> = 4 sections, 4 mice; *n*<sub>6-OHDA</sub> = 6 sections, 6 mice; *P* = 0.48). The fold increase in the GPe was much higher than that in the dStr and SNr (GPe vs. dStr, *P* = 0.0087; GPe vs. SNr, *P* = 0.0087) (**Figure 6c**). As axonal density in the GPe reflects a sum of axonal arborizations and passage axons,  
520 synaptic contacts were then quantified as an additional measure of innervation. Synaptic contacts were identified based on the close spatial relationship between eYFP<sup>+</sup> structures and VGAT<sup>+</sup> or gephyrin<sup>+</sup> elements (**Figure 6b**). The density of eYFP<sup>+</sup>-VGAT<sup>+</sup> puncta in the GPe was greatly increased following 6-OHDA lesion (naïve = 3.9 ± 2.1 × 10<sup>4</sup> count/mm<sup>3</sup>, *n* = 6 sections, 3 mice; 6-OHDA = 11.9 ± 3.0 × 10<sup>4</sup> count/mm<sup>3</sup>, *n* = 10 sections, 5 mice; *P* = 0.0096); additionally, a similar increase in the density of eYFP<sup>+</sup>-gephyrin<sup>+</sup> puncta was found under the same conditions  
525 (naïve = 4.1 ± 1.5 × 10<sup>4</sup> count/mm<sup>3</sup>, *n* = 6 sections, 3 mice; 6-OHDA = 19.3 ± 3.0 × 10<sup>4</sup> count/mm<sup>3</sup>, *n* = 8 sections, 4 mice; *P* = 0.0020) (**Figure 6c**). As dSPN-Npas1<sup>+</sup> input is the major input of dSPN projection, the increase in synaptic contacts from dSPNs explains the strengthening of the dSPN-Npas1<sup>+</sup> input measured with *ex vivo* electrophysiology following chronic 6-OHDA lesion. In contrast, we did not find any alterations in release probability for the dSPN-Npas1<sup>+</sup> input following 6-OHDA lesion, as indicated by the unaltered paired-pulse ratio (naïve = 1.1 ±



530 0.1,  $n = 10$  neurons; 6-OHDA =  $1.3 \pm 0.2$ ,  $n = 11$  neurons;  $P = 0.20$ ). In addition, no alterations in quantal amplitudes were observed following chronic 6-OHDA lesion (naïve =  $86.1 \pm 24.5$  pA,  $n = 13$  neurons; 6-OHDA =  $92.8 \pm 29.2$  pA,  $n = 22$  neurons;  $P = 0.39$ ).

## 535 **Discussion** (1332 words)

The anatomical projection from dSPNs to the GPe has been described for decades, but its postsynaptic targets and functions were largely unknown. In this study, we showed that dSPNs strongly targeted Npas1<sup>+</sup> GPe neurons, whereas iSPNs strongly targeted PV<sup>+</sup> GPe neurons. In contrast to the prediction from the classic circuit model, <sup>DLS</sup>dSPNs suppressed movements. This suppression was mediated through Npas1<sup>+</sup> neurons. In a chronic 6-OHDA  
540 lesioned mouse model of PD, dSPN-Npas1<sup>+</sup> input was dramatically strengthened through an increase in the number of synaptic contacts.

### **iSPN-PV<sup>+</sup> input is the principal component of the striatopallidal system**

Here, we demonstrated that iSPN-PV<sup>+</sup> input was the strongest connection among all striatopallidal inputs  
545 examined, namely, dSPN-PV<sup>+</sup>, dSPN-Npas1<sup>+</sup>, iSPN-PV<sup>+</sup>, and iSPN-Npas1<sup>+</sup>. Considering that PV<sup>+</sup> neurons and Npas1<sup>+</sup> neurons constitute 50% and 30% of all GPe neurons, respectively (Abdi et al., 2015; Dodson et al., 2015; Hernandez et al., 2015; Abecassis et al., 2020), iSPN-PV<sup>+</sup> input should be regarded as the principal striatopallidal input.

Our finding that iSPN-PV<sup>+</sup> input is stronger than iSPN-Npas1<sup>+</sup> input is consistent with earlier anatomical  
550 studies showing that iSPNs form more synaptic contacts with PV<sup>+</sup> neurons compared to PV<sup>-</sup> neurons (Yuan et al., 2017). In addition, it is in line with recent electrophysiological studies that iSPNs strongly target Nkx2.1<sup>+</sup> neurons (which are dominated by PV<sup>+</sup> neurons) while providing minimal input to Foxp2<sup>+</sup> neurons (which are a subset of Npas1<sup>+</sup> neurons) (Yuan et al., 2017; Aristieta et al., 2020; Ketzef and Silberberg, 2020). Furthermore, we showed that the selective targeting of iSPN input to PV<sup>+</sup> neurons was topographically conserved between the DMS and the  
555 DLS.

At a circuit level, stimulation of iSPNs strongly suppresses firing of PV<sup>+</sup> neurons, thus disinhibiting the targets of PV<sup>+</sup> neurons, i.e., the STN and substantia nigra (Mastro et al., 2014; Hernandez et al., 2015; Saunders et

al., 2016; Oh et al., 2017; Abecassis et al., 2020). As activity of PV<sup>+</sup> neurons promotes movement (Pamukcu et al., 2020), the selective targeting of PV<sup>+</sup> neurons by iSPNs is in agreement with the movement suppressing role of 560 DMS<sup>+</sup>iSPNs (Kravitz et al., 2010; Durieux et al., 2012). On the contrary, we found stimulation of DLS<sup>+</sup>iSPNs promoted movement; this cannot be explained by the targeting properties of DLS<sup>+</sup>iSPNs. Further investigations are needed to determine the circuit mechanisms involved. In the present study, we did not find any alterations in the iSPN-PV<sup>+</sup> input in the parkinsonian state. Given that iSPN-PV<sup>+</sup> input is the principal striatopallidal input, this result is at odds with our previous observation that total striatopallidal input increases following chronic 6-OHDA lesion (Cui et al., 565 2016). As our prior study employed electrical stimulation, it is likely that subtle differences in the size and the waveform of the induced currents with optogenetic stimulation interfere with presynaptic regulation of release processes.

### **The dSPN-Npas1<sup>+</sup> input is functionally unique**

570 Previous studies showed that dSPNs provide roughly half the number of boutons compared to iSPNs in the GPe (Kawaguchi et al., 1990; Fujiyama et al., 2011). Here, we found the relative number of boutons formed by iSPNs was seven times higher than that formed by dSPNs. Importantly, we demonstrated that Npas1<sup>+</sup> neurons are the principal target of dSPNs from both the DMS and DLS. This is in contrast with the earlier observation that the receptors for substance P (a neuropeptide that can be released by dSPNs) are selectively expressed in PV<sup>+</sup> neurons 575 (Mizutani et al., 2017). These findings altogether suggest a target-specific innervation with transmitters released from a single cell type, i.e., GABA and substance P released from dSPNs preferentially inhibit Npas1<sup>+</sup> neurons and excite PV<sup>+</sup> neurons, respectively. Segregation of neurotransmitter release has also been found in other systems (Zhang et al., 2015; Lee et al., 2016; Granger et al., 2020). Given that Npas1<sup>+</sup> neurons and PV<sup>+</sup> neurons have opposite effects on motor control (Cherian et al., 2020; Pamukcu et al., 2020), the inhibition of Npas1<sup>+</sup> neurons by 580 GABA and excitation of PV<sup>+</sup> neurons by substance P should work in concert to reinforce the same behavioral outcomes.

The highly selective targeting of dSPNs to Npas1<sup>+</sup> neurons can have important functional implications. Here, we demonstrated that stimulation of DLS<sup>+</sup>dSPNs or their terminals in the GPe suppressed movement. Our silencing experiment confirms that this effect is mediated by Npas1<sup>+</sup> neurons, but not PV<sup>+</sup> neurons. However, the 585 motor-suppressing effect of DLS<sup>+</sup>dSPNs (mediated through inhibitory input to Npas1<sup>+</sup> neurons) contradicts the

motor-promoting effect that we found with silencing or inhibition of  $Npas1^+$  neurons (this study; Pamukcu et al., 2020). The movement-suppressing effect exerted by  $^{DLS}dSPNs$  is opposite to the movement-promoting effect produced by  $^{DMS}dSPNs$  shown in this and other studies (Kravitz et al., 2010; Durieux et al., 2012; Freeze et al., 2013). Opposing regulation by  $^{DMS}dSPNs$  and  $^{DLS}dSPNs$  has also been found recently in regulating action sequence (Garr 590 and Delamater, 2020). The dichotomous actions of  $^{DMS}dSPNs$  and  $^{DLS}dSPNs$  cannot be explained by their cell-targeting properties as they both strongly targeted  $Npas1^+$  neurons (over  $PV^+$  neurons) in their corresponding topographical territories within the GPe. It is possible that the effect of  $^{DMS}dSPNs$  is predominantly mediated through the SNr rather than the GPe, as the DMS only innervates a small portion of the GPe.

We do not currently have a mechanistic explanation for the contradictory effects between stimulation of 595  $^{DLS}dSPNs$  and inhibition or silencing of  $Npas1^+$  neurons. First, our observations were limited to gain-of-function experiments (i.e., Chr2-mediated stimulation). Further work is needed to examine the effects with inhibition or silencing of  $^{DLS}dSPNs$ . Second, it is possible that chronic silencing induces confounding cellular and circuit changes. Third, recent studies established the existence of two subclasses of  $Npas1^+$  neurons, i.e.,  $Npas1^+-Foxp2^+$  neurons and  $Npas1^+-Nkx2.1^+$  (aka  $Npr3^+$ ) neurons that display distinct axonal projection patterns (Hernandez et 600 al., 2015; Glajch et al., 2016; Saunders et al., 2018; Evans et al., 2019; Abecassis et al., 2020; Cherian et al., 2020; Pamukcu et al., 2020). It is possible that  $^{DLS}dSPN$  input has differential impacts on these two neuron subclasses and their downstream targets. Lastly, the effect with stimulation of  $Npas1^+$  neurons can be an aggregated effect of suppressing multiple targets. As the basal ganglia is topographically organized, including the  $^{DLS}dSPN$  projection, which only innervate the lateral to intermediate regions of the GPe (Hedreen and DeLong, 1991; Deniau 605 et al., 1996; Romanelli et al., 2005; Nambu, 2011; Bertino et al., 2020), the circuitry mediating the downstream effects of  $^{DLS}dSPNs$  should differ from that of the entirety of the  $Npas1^+$  neuron population.

In this study, we provided both anatomical and functional evidence that dSPN input to the GPe was strengthened following chronic 6-OHDA lesion. These observations were unexpected, as activity of dopamine D2 receptors is known to positively regulate the density of dSPN innervation to the GPe (Cazorla et al., 2014). On the 610 other hand, as iSPN activity promotes dSPN-GPe innervation, it is likely that the observed increase in dSPN-GPe innervation following chronic 6-OHDA lesion is a consequence of increased iSPN activity *in vivo*. This argument is in agreement with the observation that the activity of iSPNs (or presumably iSPNs) are enhanced in animal models of PD (Calabresi et al., 1993; Schwarting and Huston, 1996; Kish et al., 1999; Pang et al., 2001; Tseng et al., 2001;

Mallet et al., 2006; Kita and Kita, 2011a, b; Kovaleski et al., 2020). As stimulation of <sup>DLS</sup>dSPN-Npas1<sup>+</sup> input  
615 suppresses movement, the increase in this input following chronic 6-OHDA lesion constitutes a novel mechanism  
underlying hypokinetic symptoms in this disease state.

### Parallel motor-suppressing striatal output pathways

The existence of parallel motor-suppressing striatopallidal pathways, i.e., <sup>DMS</sup>iSPN-PV<sup>+</sup> and <sup>DLS</sup>dSPN-Npas1<sup>+</sup>,  
620 suggests a complex movement regulation by the dStr. Although stimulation of either pathway similarly decreased  
average speed, the two pathways tune movement behavior in different patterns. Recent studies revealed that  
distinct behaviors are multiplexed by the same spatially compact clusters while different clusters encode different  
speed information (Barbera et al., 2016; Fobbs et al., 2020). As the DMS and the DLS are involved in distinct  
functions (goal-directed behavior and habitual behavior, respectively), it is conceivable that each functional  
625 subdomain is equipped with both motor-suppressing and motor-promoting elements for the proper movement  
execution.

### References

- 630 Abdi A, Mallet N, Mohamed FY, Sharott A, Dodson PD, Nakamura KC, Suri S, Avery SV, Larvin JT, Garas FN, Garas  
SN, Vinciati F, Morin S, Bezard E, Baufreton J, Magill PJ (2015) Prototypic and arkypallidal neurons in the  
dopamine-intact external globus pallidus. *J Neurosci* 35:6667-6688.
- Abecassis ZA, Berceau BL, Win PH, Garcia D, Xenias HS, Cui Q, Pamukcu A, Cherian S, Hernandez VM, Chon U,  
Lim BK, Kim Y, Justice NJ, Awatramani R, Hooks BM, Gerfen CR, Boca SM, Chan CS (2020) Npas1(+)-  
635 Nkx2.1(+) Neurons Are an Integral Part of the Cortico-pallido-cortical Loop. *J Neurosci* 40:743-768.
- Ade KK, Wan Y, Chen M, Gloss B, Calakos N (2011) An Improved BAC Transgenic Fluorescent Reporter Line for  
Sensitive and Specific Identification of Striatonigral Medium Spiny Neurons. *Front Syst Neurosci* 5:32.
- Ahmari SE (2016) Using mice to model Obsessive Compulsive Disorder: From genes to circuits. *Neuroscience*  
321:121-137.
- 640 Albin RL, Young AB, Penney JB (1989) The functional anatomy of basal ganglia disorders. *Trends Neurosci*  
12:366-375.

- Albin RL, Young AB, Penney JB (1995) The functional anatomy of disorders of the basal ganglia. *Trends Neurosci* 18:63-64.
- Alegre-Cortés J, Sáez M, Montanari R, Reig R (2020) Medium spiny neurons spontaneous activity reveal the discrete segregation of mouse dorsal striatum. *bioRxiv:2020.2002.2021.959692*.
- 645
- Aristieta A, Barresi M, Lindi SA, Barriere G, Courtand G, de la Crompe B, Guilhemsang L, Gauthier S, Fioramonti S, Baufreton J, Mallet NP (2020) A disynaptic circuit in the globus pallidus controls locomotion inhibition. *bioRxiv:2020.2007.2019.211318*.
- Balleine BW, O'Doherty JP (2010) Human and rodent homologues in action control: corticostriatal determinants of goal-directed and habitual action. *Neuropsychopharmacology* 35:48-69.
- 650
- Ballion B, Frenois F, Zold CL, Chetrit J, Murer MG, Gonon F (2009) D2 receptor stimulation, but not D1, restores striatal equilibrium in a rat model of Parkinsonism. *Neurobiol Dis* 35:376-384.
- Barbera G, Liang B, Zhang L, Gerfen CR, Culurciello E, Chen R, Li Y, Lin DT (2016) Spatially Compact Neural Clusters in the Dorsal Striatum Encode Locomotion Relevant Information. *Neuron* 92:202-213.
- 655
- Bekkers JM, Clements JD (1999) Quantal amplitude and quantal variance of strontium-induced asynchronous EPSCs in rat dentate granule neurons. *J Physiol* 516 ( Pt 1):227-248.
- Bertino S, Basile GA, Bramanti A, Anastasi GP, Quartarone A, Milardi D, Cacciola A (2020) Spatially coherent and topographically organized pathways of the human globus pallidus. *Hum Brain Mapp*.
- Boyden ES, Zhang F, Bamberg E, Nagel G, Deisseroth K (2005) Millisecond-timescale, genetically targeted optical control of neural activity. *Nat Neurosci* 8:1263-1268.
- 660
- Calabresi P, Mercuri NB, Sancesario G, Bernardi G (1993) Electrophysiology of dopamine-denervated striatal neurons. Implications for Parkinson's disease. *Brain* 116 ( Pt 2):433-452.
- Cazorla M, de Carvalho FD, Chohan MO, Shegda M, Chuhma N, Rayport S, Ahmari SE, Moore H, Kellendonk C (2014) Dopamine D2 receptors regulate the anatomical and functional balance of basal ganglia circuitry. *Neuron* 81:153-164.
- 665
- Cherian S, Cui Q, Pamukcu A, Chang IYM, Berceau BL, Xenias HS, Higgs MH, Rajamanickam S, Chen Y, Du X, Zhang Y, McMorrow H, Abecassis ZA, Boca SM, Justice NJ, Wilson CJ, Chan CS (2020) Dissociable Roles of Pallidal Neuron Subtypes in Regulating Motor Patterns. *bioRxiv:2020.2008.2023.263053*.

- Chon U, Vanselow DJ, Cheng KC, Kim Y (2019) Enhanced and unified anatomical labeling for a common mouse  
670 brain atlas. *Nat Commun* 10:5067.
- Costa RM (2011) A selectionist account of de novo action learning. *Curr Opin Neurobiol* 21:579-586.
- Cox J, Witten IB (2019) Striatal circuits for reward learning and decision-making. *Nat Rev Neurosci* 20:482-494.
- Cui G, Jun SB, Jin X, Pham MD, Vogel SS, Lovinger DM, Costa RM (2013) Concurrent activation of striatal direct  
and indirect pathways during action initiation. *Nature* 494:238-242.
- 675 Cui Q, Pitt JE, Pamukcu A, Poulin JF, Mabrouk OS, Fiske MP, Fan IB, Augustine EC, Young KA, Kennedy RT,  
Awatramani R, Chan CS (2016) Blunted mGluR Activation Disinhibits Striatopallidal Transmission in  
Parkinsonian Mice. *Cell Rep* 17:2431-2444.
- Darvas M, Palmiter RD (2009) Restriction of dopamine signaling to the dorsolateral striatum is sufficient for  
many cognitive behaviors. *Proc Natl Acad Sci U S A* 106:14664-14669.
- 680 Darvas M, Palmiter RD (2010) Restricting dopaminergic signaling to either dorsolateral or medial striatum  
facilitates cognition. *J Neurosci* 30:1158-1165.
- Deniau JM, Menetrey A, Charpier S (1996) The lamellar organization of the rat substantia nigra pars reticulata:  
segregated patterns of striatal afferents and relationship to the topography of corticostriatal projections.  
*Neuroscience* 73:761-781.
- 685 Desmurget M, Turner RS (2010) Motor sequences and the basal ganglia: kinematics, not habits. *J Neurosci*  
30:7685-7690.
- Dodson PD, Larvin JT, Duffell JM, Garas FN, Doig NM, Kessar N, Duguid IC, Bogacz R, Butt SJ, Magill PJ (2015)  
Distinct developmental origins manifest in the specialized encoding of movement by adult neurons of the  
external globus pallidus. *Neuron* 86:501-513.
- 690 Durieux PF, Schiffmann SN, de Kerchove d'Exaerde A (2012) Differential regulation of motor control and  
response to dopaminergic drugs by D1R and D2R neurons in distinct dorsal striatum subregions. *EMBO J*  
31:640-653.
- Evans R, Twedell E, Zhu M, Ascencio J, Zhang R, Khaliq Z (2019) Functional dissection of basal ganglia inhibitory  
input onto SNc dopaminergic neurons. *bioRxiv*:856617.

- 695 Faget L, Zell V, Souter E, McPherson A, Ressler R, Gutierrez-Reed N, Yoo JH, Dulcis D, Hnasko TS (2018)  
Opponent control of behavioral reinforcement by inhibitory and excitatory projections from the ventral  
pallidum. *Nat Commun* 9:849.
- Flaherty AW, Graybiel AM (1994) Input-output organization of the sensorimotor striatum in the squirrel monkey.  
*J Neurosci* 14:599-610.
- 700 Fobbs WC, Bariselli S, Licholai JA, Miyazaki NL, Matikainen-Ankney BA, Creed MC, Kravitz AV (2020) Continuous  
Representations of Speed by Striatal Medium Spiny Neurons. *J Neurosci* 40:1679-1688.
- Freeze BS, Kravitz AV, Hammack N, Berke JD, Kreitzer AC (2013) Control of basal ganglia output by direct and  
indirect pathway projection neurons. *J Neurosci* 33:18531-18539.
- Fujiyama F, Sohn J, Nakano T, Furuta T, Nakamura KC, Matsuda W, Kaneko T (2011) Exclusive and common  
705 targets of neostriatofugal projections of rat striosome neurons: a single neuron-tracing study using a viral  
vector. *Eur J Neurosci* 33:668-677.
- Garr E, Delamater AR (2020) Chemogenetic inhibition in the dorsal striatum reveals regional specificity of direct  
and indirect pathway control of action sequencing. *Neurobiol Learn Mem* 169:107169.
- Gerfen CR, Surmeier DJ (2011) Modulation of striatal projection systems by dopamine. *Annu Rev Neurosci*  
710 34:441-466.
- Gerfen CR, Paletzki R, Heintz N (2013) GENSAT BAC cre-recombinase driver lines to study the functional  
organization of cerebral cortical and basal ganglia circuits. *Neuron* 80:1368-1383.
- Glajch KE, Kolver DA, Hegeman DJ, Cui Q, Xenias HS, Augustine EC, Hernandez VM, Verma N, Huang TY, Luo M,  
Justice NJ, Chan CS (2016) Npas1+ Pallidal Neurons Target Striatal Projection Neurons. *J Neurosci*  
715 36:5472-5488.
- Gong S, Doughty M, Harbaugh CR, Cummins A, Hatten ME, Heintz N, Gerfen CR (2007) Targeting Cre  
recombinase to specific neuron populations with bacterial artificial chromosome constructs. *J Neurosci*  
27:9817-9823.
- Granger AJ, Wang W, Robertson K, El-Rifai M, Zanello AF, Bistrong K, Saunders A, Chow BW, Nunez V, Turrero  
720 Garcia M, Harwell CC, Gu C, Sabatini BL (2020) Cortical ChAT(+) neurons co-transmit acetylcholine and  
GABA in a target- and brain-region-specific manner. *Elife* 9.
- Graybiel AM (2008) Habits, rituals, and the evaluative brain. *Annu Rev Neurosci* 31:359-387.

Harris JA, Hirokawa KE, Sorensen SA, Gu H, Mills M, Ng LL, Bohn P, Mortrud M, Ouellette B, Kidney J, Smith KA, Dang C, Sunkin S, Bernard A, Oh SW, Madisen L, Zeng H (2014) Anatomical characterization of Cre driver mice for neural circuit mapping and manipulation. *Front Neural Circuits* 8:76.

Hedreen JC, DeLong MR (1991) Organization of striatopallidal, striatonigral, and nigrostriatal projections in the macaque. *J Comp Neurol* 304:569-595.

Hegeman DJ, Hong ES, Hernandez VM, Chan CS (2016) The external globus pallidus: progress and perspectives. *Eur J Neurosci* 43:1239-1265.

730 Hernandez VM, Hegeman DJ, Cui Q, Kever DA, Fiske MP, Glajch KE, Pitt JE, Huang TY, Justice NJ, Chan CS (2015) Parvalbumin+ Neurons and Npas1+ Neurons Are Distinct Neuron Classes in the Mouse External Globus Pallidus. *J Neurosci* 35:11830-11847.

Hintiryan H, Foster NN, Bowman I, Bay M, Song MY, Gou L, Yamashita S, Bienkowski MS, Zingg B, Zhu M, Yang XW, Shih JC, Toga AW, Dong HW (2016) The mouse cortico-striatal projectome. *Nat Neurosci* 19:1100-1114.

735 Hippenmeyer S, Vrieseling E, Sigrist M, Portmann T, Laengle C, Ladle DR, Arber S (2005) A developmental switch in the response of DRG neurons to ETS transcription factor signaling. *PLoS Biol* 3:e159.

Hooks BM, Papale AE, Paletzki RF, Feroze MW, Eastwood BS, Couey JJ, Winnubst J, Chandrashekar J, Gerfen CR (2018) Topographic precision in sensory and motor corticostriatal projections varies across cell type and cortical area. *Nat Commun* 9:3549.

740 Hunnicutt BJ, Jongbloets BC, Birdsong WT, Gertz KJ, Zhong H, Mao T (2016) A comprehensive excitatory input map of the striatum reveals novel functional organization. *Elife* 5.

Hunt AJ, Jr., Dasgupta R, Rajamanickam S, Jiang Z, Beierlein M, Chan CS, Justice NJ (2018) Paraventricular hypothalamic and amygdalar CRF neurons synapse in the external globus pallidus. *Brain Struct Funct* 223:2685-2698.

745 Jin X, Tecuapetla F, Costa RM (2014) Basal ganglia subcircuits distinctively encode the parsing and concatenation of action sequences. *Nat Neurosci* 17:423-430.

Kaiser T, Ting JT, Monteiro P, Feng G (2016) Transgenic labeling of parvalbumin-expressing neurons with tdTomato. *Neuroscience* 321:236-245.



- 750 Kawaguchi Y, Wilson CJ, Emson PC (1990) Projection subtypes of rat neostriatal matrix cells revealed by intracellular injection of biocytin. *J Neurosci* 10:3421-3438.
- Ketzef M, Silberberg G (2020) Differential Synaptic Input to External Globus Pallidus Neuronal Subpopulations *In Vivo*. *bioRxiv:2020.2002.2027.967869*.
- Kim J, Alger BE (2001) Random response fluctuations lead to spurious paired-pulse facilitation. *J Neurosci* 21:9608-9618.
- 755 Kim Y, Yang GR, Pradhan K, Venkataraju KU, Bota M, Garcia Del Molino LC, Fitzgerald G, Ram K, He M, Levine JM, Mitra P, Huang ZJ, Wang XJ, Osten P (2017) Brain-wide Maps Reveal Stereotyped Cell-Type-Based Cortical Architecture and Subcortical Sexual Dimorphism. *Cell* 171:456-469 e422.
- Kish LJ, Palmer MR, Gerhardt GA (1999) Multiple single-unit recordings in the striatum of freely moving animals: effects of apomorphine and D-amphetamine in normal and unilateral 6-hydroxydopamine-lesioned rats. *Brain Res* 833:58-70.
- 760 Kish LJ, Palmer MR, Gerhardt GA (1999) Multiple single-unit recordings in the striatum of freely moving animals: effects of apomorphine and D-amphetamine in normal and unilateral 6-hydroxydopamine-lesioned rats. *Brain Res* 833:58-70.
- Kita H (2007) Globus pallidus external segment. *Prog Brain Res* 160:111-133.
- Kita H, Kita T (2011a) Role of Striatum in the Pause and Burst Generation in the Globus Pallidus of 6-OHDA-Treated Rats. *Front Syst Neurosci* 5:42.
- 765 Kita H, Kita T (2011b) Cortical stimulation evokes abnormal responses in the dopamine-depleted rat basal ganglia. *J Neurosci* 31:10311-10322.
- Klaus A, Martins GJ, Paixao VB, Zhou P, Paninski L, Costa RM (2017) The Spatiotemporal Organization of the Striatum Encodes Action Space. *Neuron* 95:1171-1180 e1177.
- Knowland D, Lilascharoen V, Pacia CP, Shin S, Wang EH, Lim BK (2017) Distinct Ventral Pallidal Neural Populations Mediate Separate Symptoms of Depression. *Cell* 170:284-297 e218.
- 770 Knowland D, Lilascharoen V, Pacia CP, Shin S, Wang EH, Lim BK (2017) Distinct Ventral Pallidal Neural Populations Mediate Separate Symptoms of Depression. *Cell* 170:284-297 e218.
- Kovaleski RF, Callahan JW, Chazalon M, Wokosin DL, Baufreton J, Bevan MD (2020) Dysregulation of external globus pallidus-subthalamic nucleus network dynamics in parkinsonian mice during cortical slow-wave activity and activation. *J Physiol* 598:1897-1927.
- Kravitz AV, Tye LD, Kreitzer AC (2012) Distinct roles for direct and indirect pathway striatal neurons in reinforcement. *Nat Neurosci* 15:816-818.
- 775 Kravitz AV, Tye LD, Kreitzer AC (2012) Distinct roles for direct and indirect pathway striatal neurons in reinforcement. *Nat Neurosci* 15:816-818.
- Kravitz AV, Freeze BS, Parker PR, Kay K, Thwin MT, Deisseroth K, Kreitzer AC (2010) Regulation of parkinsonian motor behaviours by optogenetic control of basal ganglia circuitry. *Nature* 466:622-626.

Krzywinski M, Altman N (2014) Visualizing samples with box plots. *Nat Methods* 11:119-120.

Lee S, Zhang Y, Chen M, Zhou ZJ (2016) Segregated Glycine-Glutamate Co-transmission from vGluT3 Amacrine  
780 Cells to Contrast-Suppressed and Contrast-Enhanced Retinal Circuits. *Neuron* 90:27-34.

Lemos JC, Friend DM, Kaplan AR, Shin JH, Rubinstein M, Kravitz AV, Alvarez VA (2016) Enhanced GABA  
Transmission Drives Bradykinesia Following Loss of Dopamine D2 Receptor Signaling. *Neuron* 90:824-  
838.

Levesque M, Parent A (2005) The striatofugal fiber system in primates: a reevaluation of its organization based  
785 on single-axon tracing studies. *Proc Natl Acad Sci U S A* 102:11888-11893.

Leys C, Ley C, Klein O, Bernard P, Licata L (2013) Detecting outliers: Do not use standard deviation around the  
mean, use absolute deviation around the median. *Journal of Experimental Social Psychology* 49:764-766.

Madisen L, Zwingman TA, Sunkin SM, Oh SW, Zariwala HA, Gu H, Ng LL, Palmiter RD, Hawrylycz MJ, Jones AR,  
Lein ES, Zeng H (2010) A robust and high-throughput Cre reporting and characterization system for the  
790 whole mouse brain. *Nat Neurosci* 13:133-140.

Madisen L et al. (2015) Transgenic mice for intersectional targeting of neural sensors and effectors with high  
specificity and performance. *Neuron* 85:942-958.

Mallet N, Ballion B, Le Moine C, Gonon F (2006) Cortical inputs and GABA interneurons imbalance projection  
neurons in the striatum of parkinsonian rats. *J Neurosci* 26:3875-3884.

795 Malvaez M, Wassum KM (2018) Regulation of habit formation in the dorsal striatum. *Curr Opin Behav Sci* 20:67-  
74.

Markowitz JE, Gillis WF, Beron CC, Neufeld SQ, Robertson K, Bhagat ND, Peterson RE, Peterson E, Hyun M,  
Linderman SW, Sabatini BL, Datta SR (2018) The Striatum Organizes 3D Behavior via Moment-to-Moment  
Action Selection. *Cell* 174:44-58 e17.

800 Martin A, Calvigioni D, Tzortzi O, Fuzik J, Warnberg E, Meletis K (2019) A Spatiomolecular Map of the Striatum.  
*Cell Rep* 29:4320-4333 e4325.

Mastro KJ, Bouchard RS, Holt HA, Gittis AH (2014) Transgenic mouse lines subdivide external segment of the  
globus pallidus (GPe) neurons and reveal distinct GPe output pathways. *J Neurosci* 34:2087-2099.

Mathis A, Yüsekönül M, Rogers B, Bethge M, Mathis MW (2019) Pretraining Boosts Out-of-domain Robustness  
805 for Pose Estimation. *arXiv:1909.11229*.

Mathis A, Mamidanna P, Cury KM, Abe T, Murthy VN, Mathis MW, Bethge M (2018) DeepLabCut: markerless pose estimation of user-defined body parts with deep learning. *Nat Neurosci* 21:1281-1289.

McGarry LM, Carter AG (2017) Prefrontal Cortex Drives Distinct Projection Neurons in the Basolateral Amygdala. *Cell Rep* 21:1426-1433.

810 McGeorge AJ, Faull RL (1989) The organization of the projection from the cerebral cortex to the striatum in the rat. *Neuroscience* 29:503-537.

McIver EL, Atherton JF, Chu HY, Cosgrove KE, Kondapalli J, Wokosin D, Surmeier DJ, Bevan MD (2019) Maladaptive Downregulation of Autonomous Subthalamic Nucleus Activity following the Loss of Midbrain Dopamine Neurons. *Cell Rep* 28:992-1002 e1004.

815 Metsalu T, Vilo J (2015) ClustVis: a web tool for visualizing clustering of multivariate data using Principal Component Analysis and heatmap. *Nucleic Acids Res* 43:W566-570.

Mink JW (1996) The basal ganglia: focused selection and inhibition of competing motor programs. *Prog Neurobiol* 50:381-425.

Mizutani K, Takahashi S, Okamoto S, Karube F, Fujiyama F (2017) Substance P effects exclusively on prototypic 820 neurons in mouse globus pallidus. *Brain Struct Funct* 222:4089-4110.

Murray AJ, Sauer JF, Riedel G, McClure C, Ansel L, Cheyne L, Bartos M, Wisden W, Wulff P (2011) Parvalbumin-positive CA1 interneurons are required for spatial working but not for reference memory. *Nat Neurosci* 14:297-299.

Nambu A (2011) Somatotopic organization of the primate Basal Ganglia. *Front Neuroanat* 5:26.

825 Nath T, Mathis A, Chen AC, Patel A, Bethge M, Mathis MW (2019) Using DeepLabCut for 3D markerless pose estimation across species and behaviors. *Nat Protoc* 14:2152-2176.

Nilsson SR, Goodwin NL, Choong JJ, Hwang S, Wright HR, Norville ZC, Tong X, Lin D, Bentzley BS, Eshel N, McLaughlin RJ, Golden SA (2020) Simple Behavioral Analysis (SimBA) – an open source toolkit for computer classification of complex social behaviors in experimental animals.

830 bioRxiv:2020.2004.2019.049452.

Nuzzo RL (2016) The Box Plots Alternative for Visualizing Quantitative Data. *PM R* 8:268-272.

O'Hare JK, Ade KK, Sukharnikova T, Van Hooser SD, Palmeri ML, Yin HH, Calakos N (2016) Pathway-Specific Striatal Substrates for Habitual Behavior. *Neuron* 89:472-479.

Oh SW et al. (2014) A mesoscale connectome of the mouse brain. *Nature* 508:207-214.

835 Oh YM, Karube F, Takahashi S, Kobayashi K, Takada M, Uchigashima M, Watanabe M, Nishizawa K, Kobayashi K, Fujiyama F (2017) Using a novel PV-Cre rat model to characterize pallidonigral cells and their terminations. *Brain Struct Funct* 222:2359-2378.

Ortiz C, Navarro JF, Jurek A, Martin A, Lundeberg J, Meletis K (2020) Molecular atlas of the adult mouse brain. *Sci Adv* 6:eabb3446.

840 Owen SF, Liu MH, Kreitzer AC (2019) Thermal constraints on in vivo optogenetic manipulations. *Nat Neurosci* 22:1061-1065.

Pamukcu A, Cui Q, Xenias HS, Berceau BL, Augustine EC, Fan I, Chalasani S, Hantman AW, Lerner TN, Boca SM, Chan CS (2020) Parvalbumin<sup>+</sup> and Npas1<sup>+</sup> Pallidal Neurons Have Distinct Circuit Topology and Function. [bioRxiv:2020.2002.2014.950006](https://doi.org/10.1101/2020.2002.2014.950006).

845 Pang Z, Ling GY, Gajendiran M, Xu ZC (2001) Enhanced excitatory synaptic transmission in spiny neurons of rat striatum after unilateral dopamine denervation. *Neurosci Lett* 308:201-205.

Park J, Coddington LT, Dudman JT (2020) Basal Ganglia Circuits for Action Specification. *Annu Rev Neurosci* 43:485-507.

850 Petreanu L, Mao T, Sternson SM, Svoboda K (2009) The subcellular organization of neocortical excitatory connections. *Nature* 457:1142-1145.

Poulin JF, Caronia G, Hofer C, Cui Q, Helm B, Ramakrishnan C, Chan CS, Dombeck DA, Deisseroth K, Awatramani R (2018) Mapping projections of molecularly defined dopamine neuron subtypes using intersectional genetic approaches. *Nat Neurosci* 21:1260-1271.

855 Redgrave P, Rodriguez M, Smith Y, Rodriguez-Oroz MC, Lehericy S, Bergman H, Agid Y, DeLong MR, Obeso JA (2010) Goal-directed and habitual control in the basal ganglia: implications for Parkinson's disease. *Nat Rev Neurosci* 11:760-772.

Romanelli P, Esposito V, Schaal DW, Heit G (2005) Somatotopy in the basal ganglia: experimental and clinical evidence for segregated sensorimotor channels. *Brain Res Brain Res Rev* 48:112-128.

860 Rothwell PE, Fuccillo MV, Maxeiner S, Hayton SJ, Gokce O, Lim BK, Fowler SC, Malenka RC, Sudhof TC (2014) Autism-associated neuroligin-3 mutations commonly impair striatal circuits to boost repetitive behaviors. *Cell* 158:198-212.

- Rueda-Orozco PE, Robbe D (2015) The striatum multiplexes contextual and kinematic information to constrain motor habits execution. *Nat Neurosci* 18:453-460.
- Ryan MB, Bair-Marshall C, Nelson AB (2018) Aberrant Striatal Activity in Parkinsonism and Levodopa-Induced  
865 Dyskinesia. *Cell Rep* 23:3438-3446 e3435.
- Sandler M, Howard A, Zhu M, Zhmoginov A, Chen LC (2019) MobileNetV2: Inverted Residuals and Linear Bottlenecks. *arXiv:1801.04381*.
- Saunders A, Huang KW, Sabatini BL (2016) Globus Pallidus Externus Neurons Expressing parvalbumin Interconnect the Subthalamic Nucleus and Striatal Interneurons. *PLoS One* 11:e0149798.
- 870 Saunders A, Macosko EZ, Wysoker A, Goldman M, Krienen FM, de Rivera H, Bien E, Baum M, Bortolin L, Wang S, Goeva A, Nemesh J, Kamitaki N, Brumbaugh S, Kulp D, McCarroll SA (2018) Molecular Diversity and Specializations among the Cells of the Adult Mouse Brain. *Cell* 174:1015-1030 e1016.
- Schindelin J, Arganda-Carreras I, Frise E, Kaynig V, Longair M, Pietzsch T, Preibisch S, Rueden C, Saalfeld S, Schmid B, Tinevez JY, White DJ, Hartenstein V, Eliceiri K, Tomancak P, Cardona A (2012) Fiji: an open-  
875 source platform for biological-image analysis. *Nat Methods* 9:676-682.
- Schwartz RK, Huston JP (1996) The unilateral 6-hydroxydopamine lesion model in behavioral brain research. Analysis of functional deficits, recovery and treatments. *Prog Neurobiol* 50:275-331.
- Shin S, Pribiag H, Lilascharoen V, Knowland D, Wang XY, Lim BK (2018) Drd3 Signaling in the Lateral Septum Mediates Early Life Stress-Induced Social Dysfunction. *Neuron* 97:195-208 e196.
- 880 Smith Y, Raju DV, Pare JF, Sidibe M (2004) The thalamostriatal system: a highly specific network of the basal ganglia circuitry. *Trends Neurosci* 27:520-527.
- Streit M, Gehlenborg N (2014) Bar charts and box plots. *Nat Methods* 11:117.
- Tseng KY, Kasanetz F, Kargieman L, Riquelme LA, Murer MG (2001) Cortical slow oscillatory activity is reflected in the membrane potential and spike trains of striatal neurons in rats with chronic nigrostriatal lesions. *J*  
885 *Neurosci* 21:6430-6439.
- Turner RS, Anderson ME (1997) Pallidal discharge related to the kinematics of reaching movements in two dimensions. *J Neurophysiol* 77:1051-1074.
- Turner RS, Desmurget M (2010) Basal ganglia contributions to motor control: a vigorous tutor. *Curr Opin Neurobiol* 20:704-716.

- 890 Turner RS, Grafton ST, Votaw JR, DeLong MR, Hoffman JM (1998) Motor subcircuits mediating the control of movement velocity: a PET study. *J Neurophysiol* 80:2162-2176.
- Walters JR, Hu D, Itoga CA, Parr-Brownlie LC, Bergstrom DA (2007) Phase relationships support a role for coordinated activity in the indirect pathway in organizing slow oscillations in basal ganglia output after loss of dopamine. *Neuroscience* 144:762-776.
- 895 Weglage M, Wörnberg E, Lazaridis I, Tzortzi O, Meletis K (2020) Complete representation of action space and value in all striatal pathways. [bioRxiv:2020.2003.2029.983825](https://doi.org/10.1101/2020.03.20.29.983825).
- Wichmann T, DeLong MR (2003) Pathophysiology of Parkinson's disease: the MPTP primate model of the human disorder. *Ann N Y Acad Sci* 991:199-213.
- Wu Y, Richard S, Parent A (2000) The organization of the striatal output system: a single-cell juxtacellular labeling  
900 study in the rat. *Neurosci Res* 38:49-62.
- Xu-Friedman MA, Regehr WG (1999) Presynaptic strontium dynamics and synaptic transmission. *Biophys J* 76:2029-2042.
- Xu-Friedman MA, Regehr WG (2000) Probing fundamental aspects of synaptic transmission with strontium. *J Neurosci* 20:4414-4422.
- 905 Xu W, Sudhof TC (2013) A neural circuit for memory specificity and generalization. *Science* 339:1290-1295.
- Yamamoto M, Wada N, Kitabatake Y, Watanabe D, Anzai M, Yokoyama M, Teranishi Y, Nakanishi S (2003) Reversible suppression of glutamatergic neurotransmission of cerebellar granule cells in vivo by genetically manipulated expression of tetanus neurotoxin light chain. *J Neurosci* 23:6759-6767.
- Yin HH, Knowlton BJ (2006) The role of the basal ganglia in habit formation. *Nat Rev Neurosci* 7:464-476.
- 910 Yuan XS, Wang L, Dong H, Qu WM, Yang SR, Cherasse Y, Lazarus M, Schiffmann SN, d'Exaerde AK, Li RX, Huang ZL (2017) Striatal adenosine A2A receptor neurons control active-period sleep via parvalbumin neurons in external globus pallidus. *Elife* 6.
- Zhang S, Qi J, Li X, Wang HL, Britt JP, Hoffman AF, Bonci A, Lupica CR, Morales M (2015) Dopaminergic and glutamatergic microdomains in a subset of rodent mesoaccumbens axons. *Nat Neurosci* 18:386-392.
- 915 Znamenskiy P, Zador AM (2013) Corticostriatal neurons in auditory cortex drive decisions during auditory discrimination. *Nature* 497:482-485.

## Figure Legends

### Figure 1. dSPNs send terminating axons to the GPe.

920 **a.** *Top left*, a confocal micrograph showing retrogradely-labeled spiny projection neurons (SPNs) in the dorsal striatum (dStr) from a Cre-reporter ( $R26^{\text{LSL-tdTomato}}$ ) mouse. A Cre-expressing lentivirus and CTb 488 were injected into the GPe.  $\text{tdTomato}^+$  and  $\text{CTb 488}^+$  neurons (in white circles) were visible. *Bottom left*, unbiased quantification of GPe-projecting neurons across the entire brain. Each marker represents a mouse ( $n = 8$  mice). The arrow points to the data (red) from the dStr. *Right*, representative two-photon images from coronal sections showing GPe-

925 projecting neurons were found in the dStr, central amygdala (CeA), parafascicular nucleus (PF), and subthalamic nucleus (STN). Inset in the first image indicates the location of the injection site. Scale bar in the third image applies to the bottom three images.

**b.** *Left*, high-magnification images showing that terminals ( $\text{eGFP}^+$ , white) from iSPNs or dSPNs were abundant in the GPe. CreOn-mRuby2-T2A-Synaptophysin-eGFP adeno-associated virus (AAV) was injected into the dStr of

930  $\text{Adora2a}^{\text{Cre}}$  (*top*),  $\text{Drd1a}^{\text{Cre}}$  (*middle*), and  $\text{Tac1}^{\text{Cre}}$  (*bottom*) mice to visualize SPN terminals. Maximal projections from ten optical sections are shown. *Inset*, mRuby2<sup>+</sup> dSPNs in the dStr. *Top & middle right*, immunohistological analyses showing that  $\text{eGFP}^+$  boutons (green) were in proximity with vesicular GABA transporter (VGAT) and gephyrin (magenta), as shown in white in three orthogonal planes. *Bottom right*, quantification of  $\text{eGFP}^+$  bouton density in the GPe from  $\text{Adora2a}^{\text{Cre}}$  ( $n = 12$  ROIs),  $\text{Drd1a}^{\text{Cre}}$  ( $n = 10$  ROIs), and  $\text{Tac1}^{\text{Cre}}$  ( $n = 12$  ROIs) mice.

935 **c.** *Left*, a low-magnification micrograph from a sagittal brain section demonstrating the target of retrograde tracers CTb 488 and CTb 647 into the GPe and SNr, respectively. The  $\text{Drd1a}^{\text{tdTomato}}$  allele was used to decipher the identity of SPNs. *Right*, representative high-magnification images illustrating CTb 488 and CTb 647 were detected in the same  $\text{tdTom}^+$  neurons in the dStr. White circles denote colocalization.

**d.** A low-magnification micrograph from a sagittal brain section showing the expression of eYFP in the dStr as well

940 as its projection targets including the GPe, GPi, and SNr following injections of CreOn-Flp canine adenovirus (CAV) into the SNr in combination with CreOn-FlpOn-ChR2-eYFP AAV into the dStr of a  $\text{Drd1a}^{\text{Cre}}$  mouse. CTb 647 was co-injected with CreOn-Flp CAV to visualize the injection site. Inset shows the  $\text{eYFP}^+$  axons in the GPe.

Abbreviations: BLA, basolateral amygdalar nucleus; BSTa, bed nuclei of the stria terminalis, anterior division; cc, corpus callosum; CeA, central amygdala; CLA, claustrum; cpd, cerebral peduncle; Ctx, cortex; DR, dorsal raphe

945 nucleus; dStr, dorsal striatum; fr, fasciculus retroflexus; GPe, external globus pallidus; GPi, internal globus pallidus;



GU, gustatory areas; MOp, primary motor area; MOs, secondary motor area; MRN, midbrain reticular nucleus; opt, optic tract; PAG, periaqueductal gray; PF, parafascicular nucleus; PO, posterior complex of the thalamus; PPN, pedunculo-pontine nucleus; PRNc, pontine reticular nucleus, caudal part; PRNr, pontine reticular nucleus, rostral part; SCm, superior colliculus, motor related; SI, substantia innominata; SNc, substantia nigra pars compacta; SNr, substantia nigra pars reticulata; SSp-bfd, primary somatosensory area, barrel field; SSp-II, primary somatosensory area, lower limb; SSp-m, primary somatosensory area, mouth; SSp-n, primary somatosensory area, nose; SSp-tr, primary somatosensory area, trunk; SSp-ul, primary somatosensory area, upper limb; SSs, supplemental somatosensory area; STN, subthalamic nucleus; VAL, ventral anterior-lateral complex of the thalamus; VISC, visceral area; VM, ventromedial thalamic nucleus; VPM, ventral posteromedial thalamic nucleus; Th, thalamus; ZI, zona incerta.

## Figure 2. dSPN and iSPN inputs to GPe have unique properties.

**a.** *Left*, confocal micrographs of two neighboring brain sections showing the iSPN projection to the GPe. The dStr of an *Adora2a*<sup>Cre</sup> mouse was transduced with a CreOn-ChR2-eYFP AAV. The association of enkephalin (*top*) and substance P (*bottom*) with eYFP-labeled axonal fibers in the GPe was assessed with immunofluorescence labeling. *Right*, high-magnification images showing the spatial relationship between enkephalin (magenta, *top*) and substance P (magenta, *bottom*) with iSPN axons (green) in the GPe. Rectangular images show orthogonal projections. Crosshairs indicate the projected planes.

**b.** *Left*, confocal micrographs of two neighboring brain sections showing the dSPN projection to the GPe. The dStr of a *Drd1a*<sup>Cre</sup> mouse was transduced with a CreOn-ChR2-eYFP AAV. The association of enkephalin (*top*) and substance P (*bottom*) with eYFP-labeled axonal fibers in the GPe was assessed with immunofluorescence labeling. *Right*, high-magnification images showing the spatial relationship between enkephalin (magenta, *top*) and substance P (magenta, *bottom*) with dSPN axons (green).

**c.** *Top*, representative voltage-clamp recordings showing striatopallidal (dStr-GPe) inhibitory postsynaptic currents (IPSCs) in control (gray) condition and in the presence of quinpirole (10  $\mu$ M, black). IPSCs were evoked with optogenetics; light was delivered in the dStr. *Drd1a*<sup>Cre</sup> and *Adora2a*<sup>Cre</sup> mice were used to examine the properties of dSPN and iSPN inputs, respectively. dSPN-GPe IPSCs (*top*) and iSPN-GPe IPSCs (*middle* and *bottom*) are shown. The bottom recording was from an identified PV<sup>+</sup> neuron. *Bottom*, the relative iSPN-GPe IPSC amplitude was



plotted vs. time ( $n = 12$  neurons). The horizontal black line denotes the timing of quinpirole application.

975 **d.** *Top*, box plots summarizing the effect of quinpirole on dStr-GPe IPSC amplitude. All recorded neurons for dSPN or iSPN input (dSPN input = 6 neurons, iSPN input = 16 neurons) are shown on the *left*. Plots on the *right* show iSPN input broken down by neuron types ( $PV^+$  = 4 neurons,  $Npas1^-$  = 7 neurons,  $Npas1^+$  = 5 neurons). *Bottom*, quantification of eGFP<sup>+</sup> bouton density in the GPe shown in **e** (DMS: *Adora2a*<sup>Cre</sup> = 6 ROIs, *Drd1a*<sup>Cre</sup> = 4 ROIs, *Tac1*<sup>Cre</sup> = 6 ROIs, DLS: *Adora2a*<sup>Cre</sup> = 6 ROIs, *Drd1a*<sup>Cre</sup> = 6 ROIs, *Tac1*<sup>Cre</sup> = 6 ROIs).

980 **e.** Representative high-magnification images showing SPN terminals (eGFP<sup>+</sup>, white) in the GPe. CreOn-mRuby2-T2A-Synaptophysin-eGFP AAV was injected into the dStr subregions of *Adora2a*<sup>Cre</sup>, *Drd1a*<sup>Cre</sup> and *Tac1*<sup>Cre</sup> mice. Terminals from iSPNs (*Adora2a*<sup>Cre</sup>) or dSPNs (*Drd1a*<sup>Cre</sup> & *Tac1*<sup>Cre</sup>) from the dorsomedial striatum (DMS) (*left*) or dorsolateral striatum (DLS) (*right*) were abundant in the GPe. Images from medial and intermediate levels of the GPe are shown for terminals from the DMS and DLS, respectively. Maximal intensity from ten optical sections is  
985 shown for each example.

### Figure 3. Optogenetic stimulation of SPN subtypes produces unique changes in movement metrics.

**a.** *Left*, a heatmap summarizing motor responses of mice to optogenetic stimulation of <sup>DLS</sup>dSPNs (red), <sup>DMS</sup>dSPNs (blue), <sup>DLS</sup>iSPNs (green), <sup>DMS</sup>iSPNs (purple). Twenty-five movement metrics were measured to fully capture the behavioral structures. Each of the 25 rows represents the fold change of movement metrics. Warm colors (red) represent positive changes; cool colors (blue) represent negative changes. Rows and columns were sorted using hierarchical clustering. Dendrograms are divided into two main arms; metrics on the upper arm are positively correlated with 'total frequency', while metrics on the lower arm are negatively correlated with 'total frequency'. Each column is a mouse; 48 mice were used in this and all subsequent analyses in **b–e** (<sup>DLS</sup>dSPNs = 13 mice,  
995 <sup>DMS</sup>dSPNs = 9 mice, <sup>DLS</sup>iSPNs = 15 mice, <sup>DMS</sup>iSPNs = 11 mice). *Right*, a heatmap summarizing motor responses of mice to optogenetic stimulation of genetically-defined neurons in the GPe. The neurons of interest are *Foxp2*<sup>+</sup> (pink), *Kcng4*<sup>+</sup> (purple), *Npas1*<sup>+</sup> (green), *PV*<sup>+</sup> (orange). The plot was reproduced from Cherian et al. (Cherian et al., 2020).

**b.** Mean changes in the event frequency of motionless, fine movement, rearing, and locomotion upon optogenetic  
000 stimulation (blue horizontal lines) of <sup>DMS</sup>dSPNs, <sup>DLS</sup>dSPNs, <sup>DMS</sup>iSPNs, and <sup>DLS</sup>iSPNs.

**c.** Slopegraphs showing the time spent for motionless, fine movement, and locomotion in mice and the effect with optogenetic stimulation of selective neuron types. Each connected line represents a mouse.

**d.** A correlation matrix constructed using data from *Adora2a*<sup>Cre</sup> and *Drd1a*<sup>Cre</sup> mice transduced with CreOn-ChR2-eYFP AAV. Eighteen parameters were included in this matrix. Blue colors indicate positive correlations, whereas

005 brown colors indicate negative correlations. *Inset*, Principal component analysis plots showing the distribution of <sup>DMS</sup>dSPNs (blue), <sup>DLS</sup>dSPNs (red), <sup>DMS</sup>iSPNs (purple), and <sup>DLS</sup>iSPNs (green). Fold changes of twenty three movement metrics with optogenetic stimulation were used in this analysis.

**e.** A correlation matrix constructed from fold changes in movement metrics following optogenetic stimulation of <sup>DMS</sup>dSPNs, <sup>DLS</sup>dSPNs, <sup>DMS</sup>iSPNs, and <sup>DLS</sup>iSPNs. Blue colors indicate positive correlations, brown colors indicate

010 negative correlations.

#### **Figure 4. <sup>DLS</sup>dSPNs-mediated motor suppression requires Npas1<sup>+</sup> neurons.**

**a.** A low-magnification micrograph showing the expression of eGFP in Npas1<sup>+</sup> neurons and their axonal projections following a targeted injection of a tetanus toxin light chain (TeTLC)-expressing AAV (CreOn-eGFP-2A-TeTLC) in the  
015 GPe of a *Npas1*<sup>Cre</sup> mouse.

**b.** The validity of the silencing mediated by TeTLC was demonstrated by the increased locomotor activity in an open-field arena (control = 8 mice, TeTLC = 11 mice). *Npas1*<sup>Cre</sup> mice transduced with CreOn-eYFP AAV were used as the control.

**c.** The transduction specificity in Npas1 neurons was assessed by eGFP expression patterns. Somatic eGFP  
020 expression was exclusively observed in the GPe. Consistent with specific transduction of Npas1<sup>+</sup> neurons, axonal expression of eGFP was abundant in Ctx, dStr, TRN, and SNc, but not in STN or SNr.

**d.** *Left*, time course of normalized distance pre, during, and after stimulation of <sup>DLS</sup>dSPN terminals in the GPe, with no neurons silenced (ctrl, *n* = 16 mice), with PV<sup>+</sup> neurons silenced (*n* = 11 mice), and with Npas1<sup>+</sup> neurons silenced (*n* = 10 mice) using CreOn-TeTLC-eGFP AAV (*top to bottom*). Black lines indicate the mean value. Top and bottom  
025 ends of the gray shaded area represent standard error of mean. Blue bars denote the period of blue light stimulation. *Middle*, speed during light-period was plotted against speed during pre-period for the respective groups to the left. Data from *Drd1a*<sup>Cre</sup> mice receiving CreOn-eYFP AAV injection and stimulation identical to ChR2 group were also included in the top plot (*n* = 6 mice). *Right*, movement tracks during pre-period and light-period

are shown. For each group, data from six mice (ten trials each) were pooled for illustration.

030 **e.** *Left*, summary of changes in speed for experimental groups in **d**. Experimental setup is summarized at bottom of the box plots. Effects with stimulation of <sup>DLS</sup>dSPN soma ( $n = 13$  mice) and <sup>DMS</sup>dSPN terminals ( $n = 6$  mice) in the GPe were also included for comparison. *Inset*, immunohistology reveals the selective expression of TeTLC (as indicated by eGFP expression) in  $Npas1^+$  neurons from  $Npas1^{Cre}$  mice injected with CreOn-TeTLC-eGFP AAV into the GPe.

035

### **Figure 5. dSPNs strongly innervate $Npas1^+$ neurons.**

**a.** *Top*, low-magnification images showing GPe starter cells (*left*, white) and striatal input cells (*right*, green) in coronal brain sections from  $Npas1^{Cre}$  (*left*) or  $Pvalb^{Cre}$  (*right*) mice injected with hSyn-DIO-mRuby2-TVA-RVG AAV and rabies virus expressing eGFP sequentially into the GPe. *Bottom*, representative high-magnification images showing that striatal input cells (eGFP<sup>+</sup>, green) from  $Pvalb^{Cre}$  (*left*) or  $Npas1^{Cre}$  (*right*) mice were positive for *Drd1a* (yellow) or *Drd2* (magenta) mRNA.

040

**b.** *Left*, representative traces showing IPSCs recorded in PV<sup>+</sup> or  $Npas1^+$  neurons with optogenetic stimulation of dSPNs (*top*) or iSPNs (*bottom*) in the DLS. Traces from five stimulus intensities (2.4–56.7 mW/mm<sup>2</sup>) are shown. *Right*, input-output relationship for corresponding inputs. A full list of median values, sample sizes, and statistical comparisons at different stimulus intensities for discrete inputs is shown in **Table 3**. Response rate for each input is shown in **Table 5**.

045

**c.** Summary of anatomical (see **a**,  $Pvalb^{Cre} = 5$  mice,  $Npas1^{Cre} = 5$  mice) and functional (see **b**, dSPN-PV<sup>+</sup> = 8 neurons, dSPN- $Npas1^+$  = 28 neurons, iSPN-PV<sup>+</sup> = 12 neurons, iSPN- $Npas1^+$  = 20 neurons) connectivity for discrete dStr-GPe inputs. The IPSC amplitudes at maximal stimulus intensity are plotted.

050 **d.** *Top*, representative raster plots showing that stimulation (10 Hz for 2s) of iSPNs or dSPNs in the DLS strongly suppressed firing of PV<sup>+</sup> or  $Npas1^+$  neurons, respectively. Blue bars indicate the period of blue light stimulation. *Bottom*, summary of changes in baseline activity with stimulation of discrete dStr-GPe inputs (dSPN-PV<sup>+</sup> = 9 neurons, dSPN- $Npas1^+$  = 11 neurons, iSPN-PV<sup>+</sup> = 9 neurons, iSPN- $Npas1^+$  = 11 neurons).

### 055 **Figure 6. dSPN inputs are selectively strengthened following chronic 6-OHDA lesion.**

**a.** Confocal micrographs showing the innervation of dSPN axons in the GPe from naïve (*left*) and 6-OHDA lesioned

(*right*) mice. To visualize dSPN axons, *Drd1a*<sup>Cre</sup> mice were transduced with CreOn-ChR2-eYFP AAV. Intermediate (*top*) and medial (*bottom*) levels are shown.

**b.** Representative high-magnification images showing dSPN bouton density in the GPe from naïve (*left*) and 6-OHDA lesioned (*right*) mice. dSPN boutons were represented by VGAT<sup>+</sup> (magenta) and syp-eGFP<sup>+</sup> (green) puncta. CreOn-mRuby2-T2A-Synaptophysin-eGFP AAV was injected into the dStr of *Drd1a*<sup>Cre</sup> mice for the visualization of dSPN terminals. Breakout panels show orthogonal xz-projection (*bottom*) and yz-projection (*right*). Crosshairs indicate the pixel of interest. The colocalization of the signals is shown as white.

**c.** Quantification of the data shown in **a** and **b**: axonal density (naïve = 4 mice, 6-OHDA = 6 mice), eYFP<sup>+</sup>-VGAT<sup>+</sup> puncta density (naïve = 6 sections, 6-OHDA = 10 sections), and eYFP<sup>+</sup>-gephyrin<sup>+</sup> puncta density (naïve = 6 sections, 6-OHDA = 8 sections).

**d.** Representative voltage-clamp recordings showing IPSCs arose from dSPNs in PV<sup>+</sup> neurons (*top*) and Npas1<sup>+</sup> neurons (*bottom*). A range of stimulus intensities (2.4–56.7 mW/mm<sup>2</sup>) were tested. Note the increase in IPSC amplitude in 6-OHDA mice (red, *right*) compared to that from naïve (black, *left*).

**e.** Connection strengths from dSPNs (*left*) and iSPNs (*right*) to PV<sup>+</sup> neurons and Npas1<sup>+</sup> neurons across two DLS (*top*) and DMS domains (*bottom*) were assessed with both somatic (i.e., intrastriatal, dStr) and terminal (i.e., intrapallidal, GPe) stimulation. Results are summarized as box plots. See **Table 3 & 4** for a full listing of IPSC amplitudes and sample sizes.

**f.** GABA<sub>A</sub> receptor dependency of the IPSCs were tested with a GABA<sub>A</sub> receptor antagonist, SR95531 (10 μM). Each marker represents a cell (dSPN-Npas1<sup>+</sup> = 4 neurons, iSPN-PV<sup>+</sup> = 5 neurons).

**g.** The spatial specificity of the optogenetic stimulation was assessed with the applications of tetrodotoxin (TTX 1 μM, light green) and its co-application with 4-aminopyridine (4-AP 100 μM, dark green). Each marker represents a cell (dSPN-Npas1<sup>+</sup>: dStr stim = 5 neurons, GPe stim = 5 neurons, iSPN-PV<sup>+</sup>: dStr stim = 7 neurons, GPe stim = 3 neurons).



**a** Whole-brain input mapping

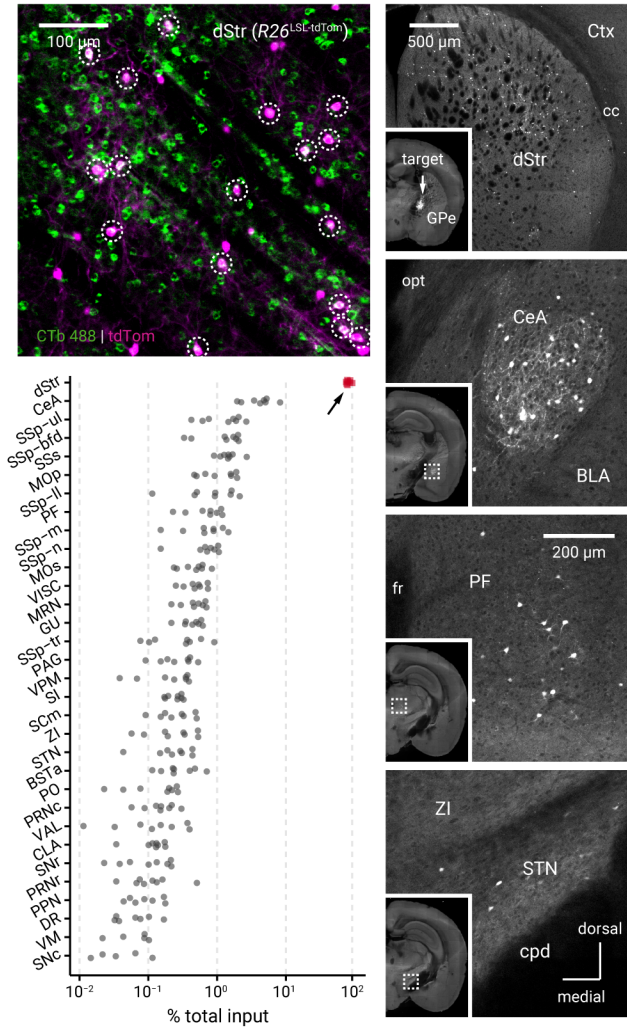

**b** Synaptic labeling

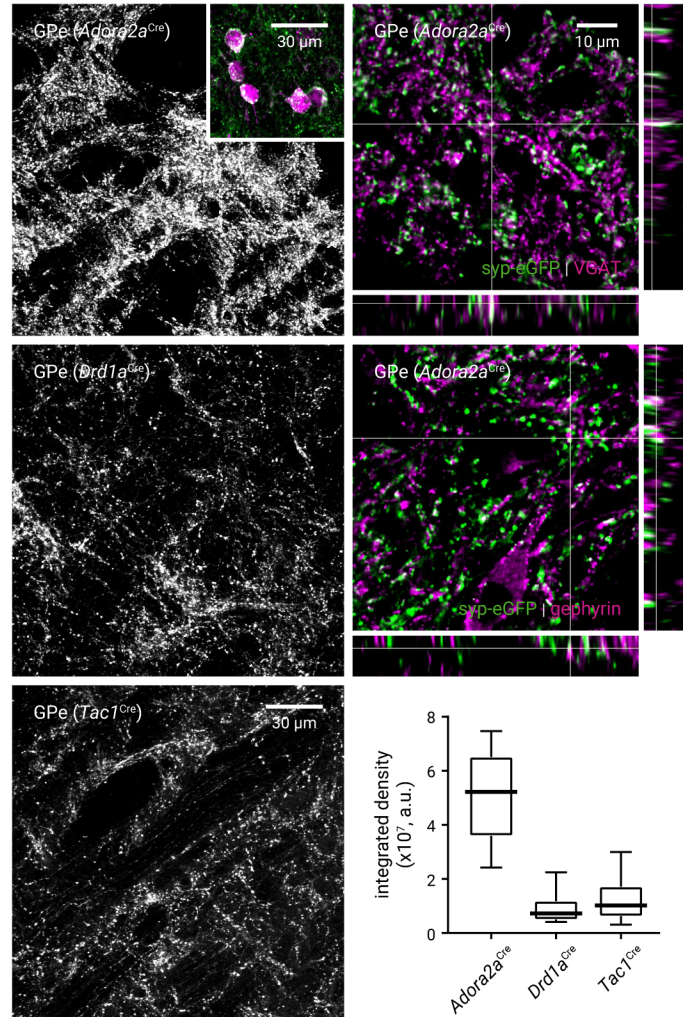

**c** Conventional retrograde tracing

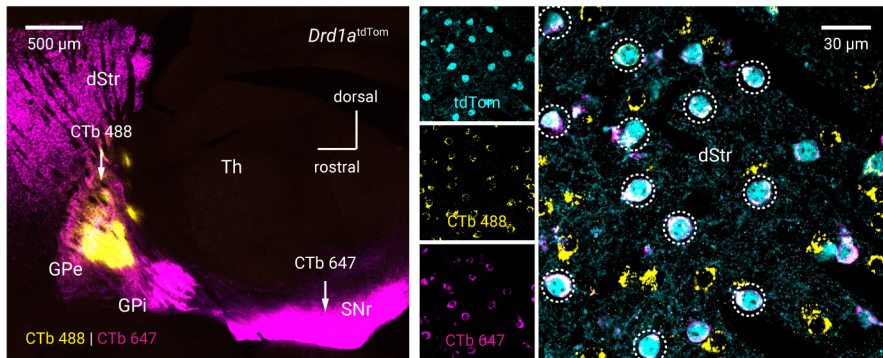

**d** Intersectional viral tracing

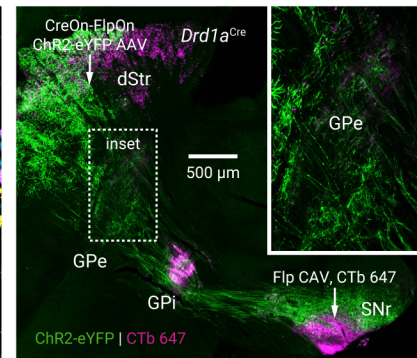

Figure 1



**a** Marker expression, iSPNs

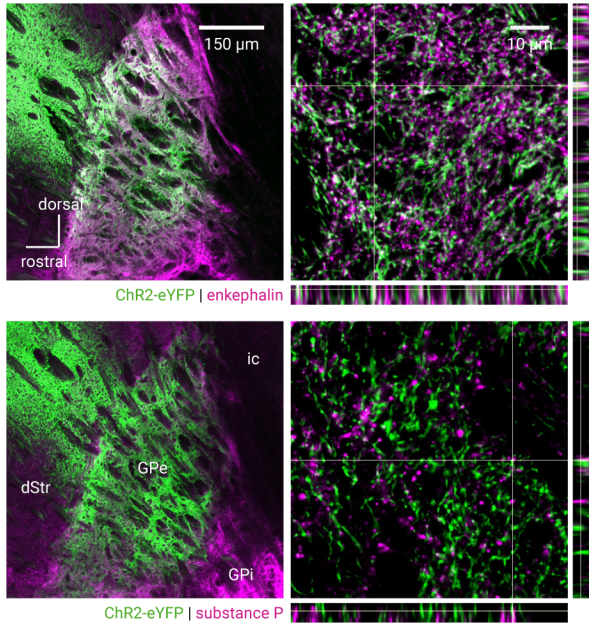

**b** Marker expression, dSPNs

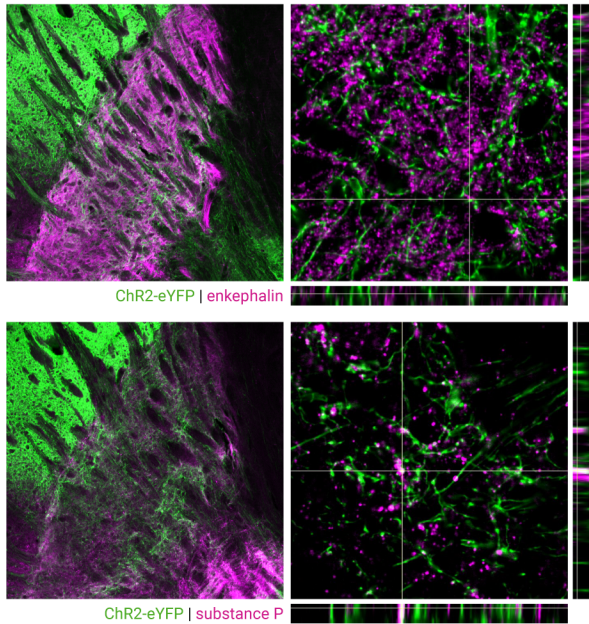

**c** dStr-GPe IPSCs

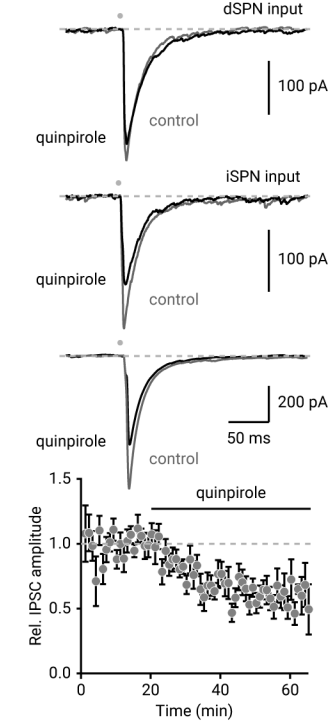

**d** Data summary

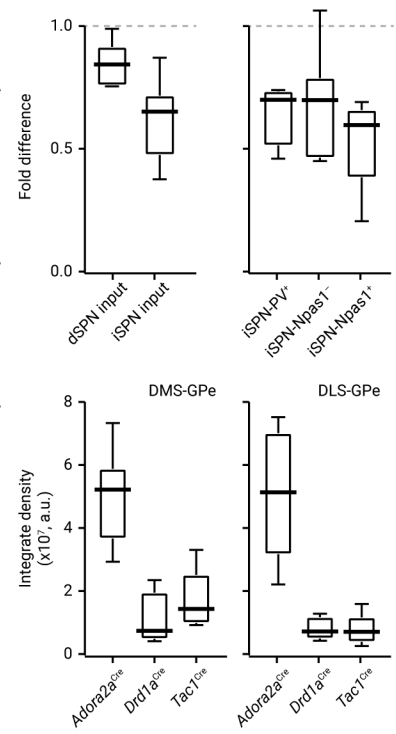

**e** Spatial organization

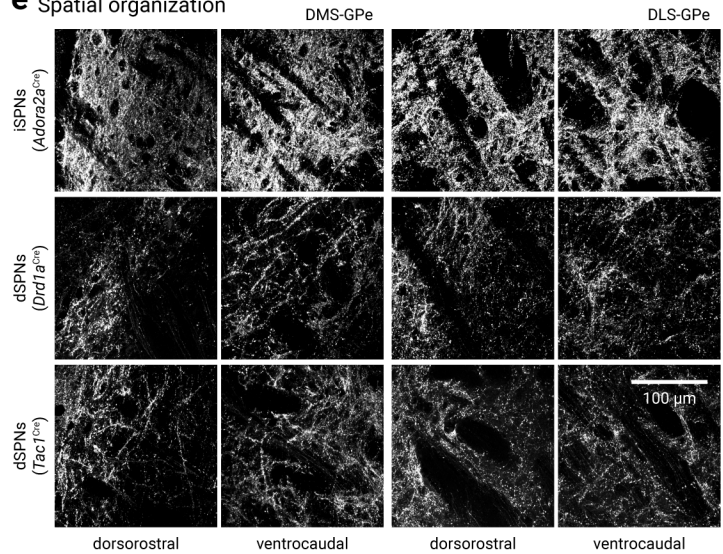

Figure 2

**a Behavior summary**

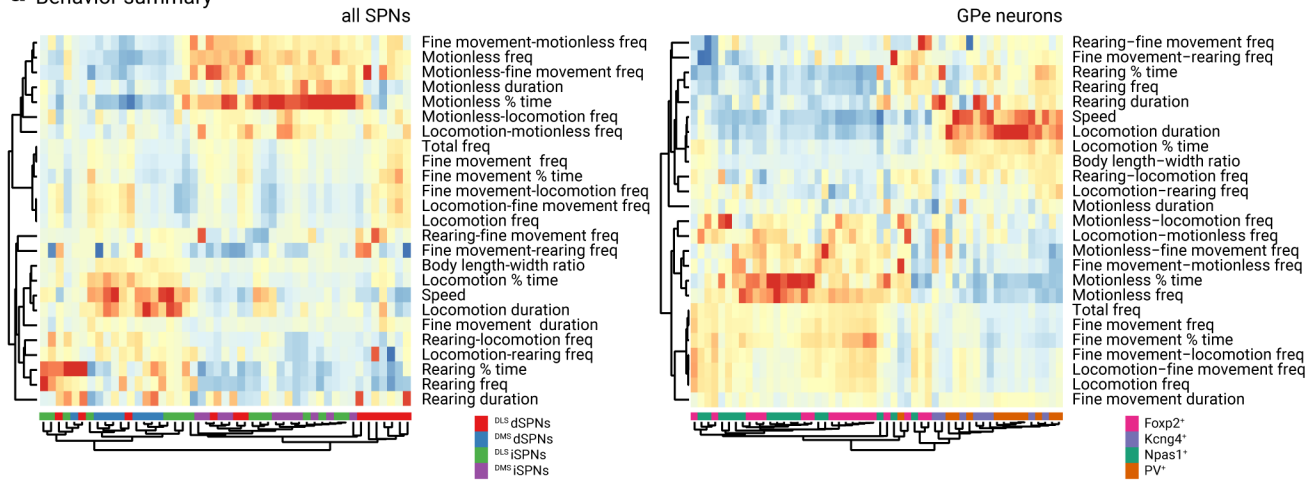

**b Event frequency**

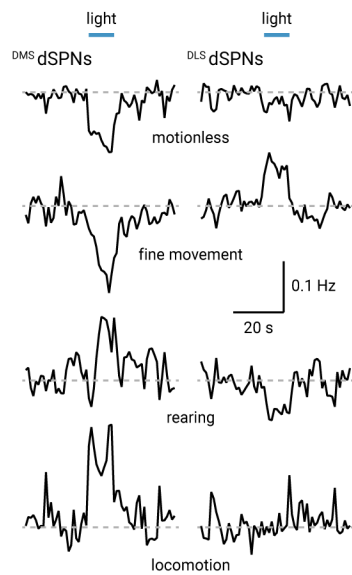

**c Time spent (%)**

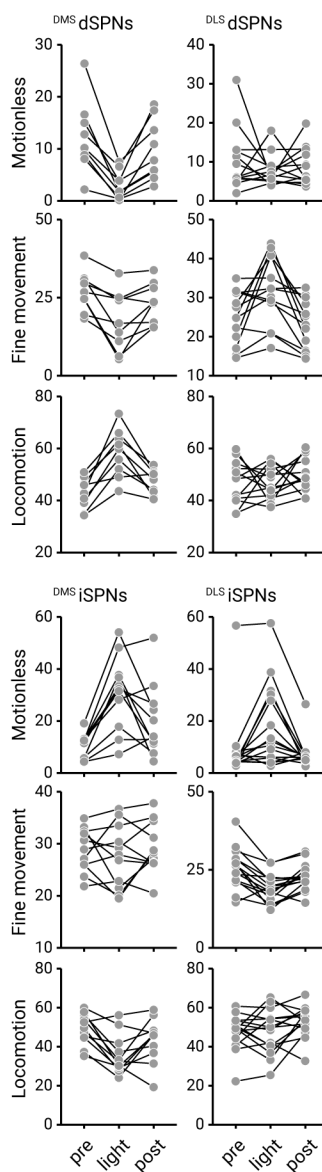

**d Raw data**

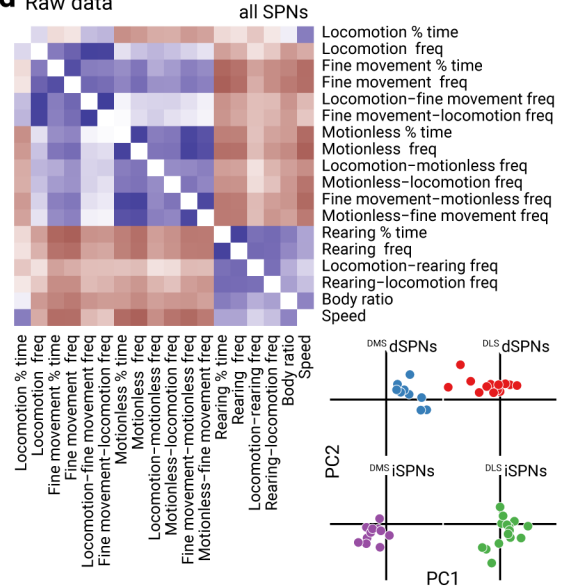

**e Fold change**

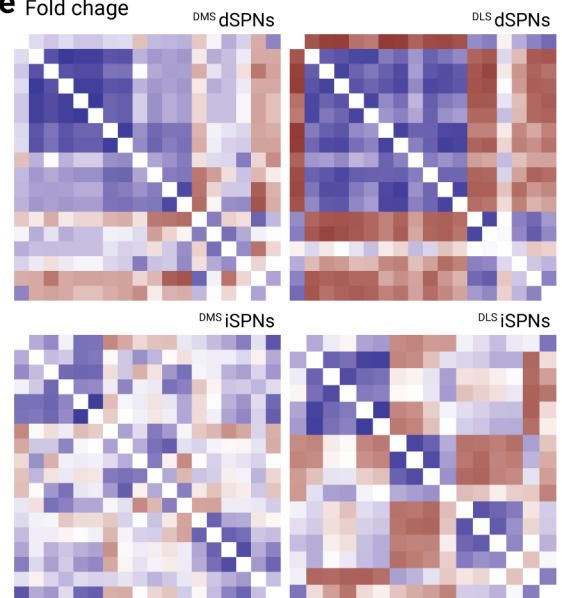

Figure 3



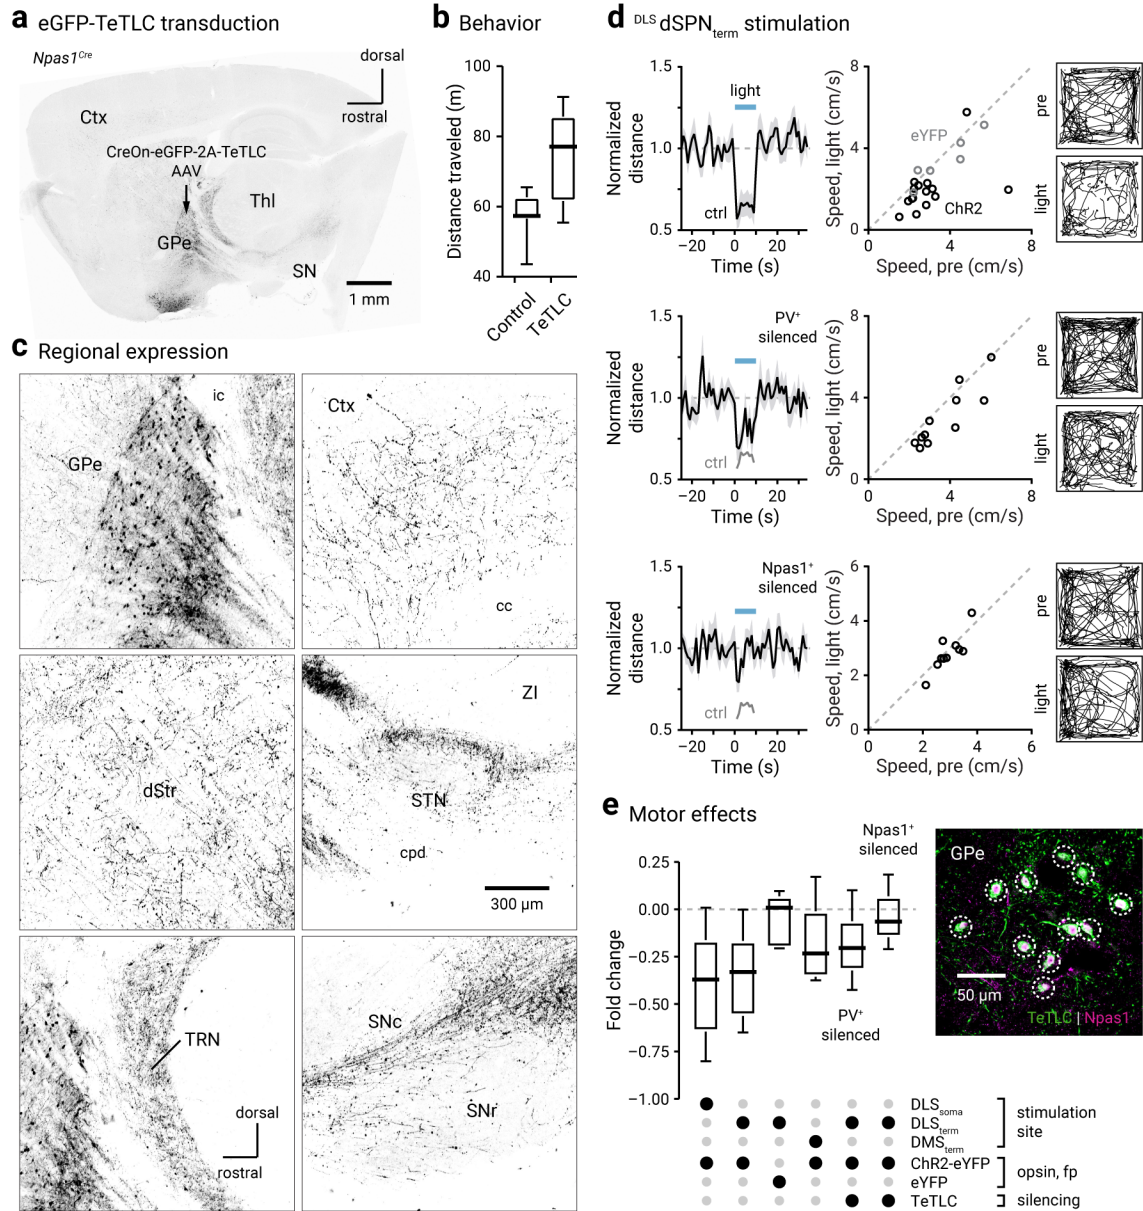

Figure 4

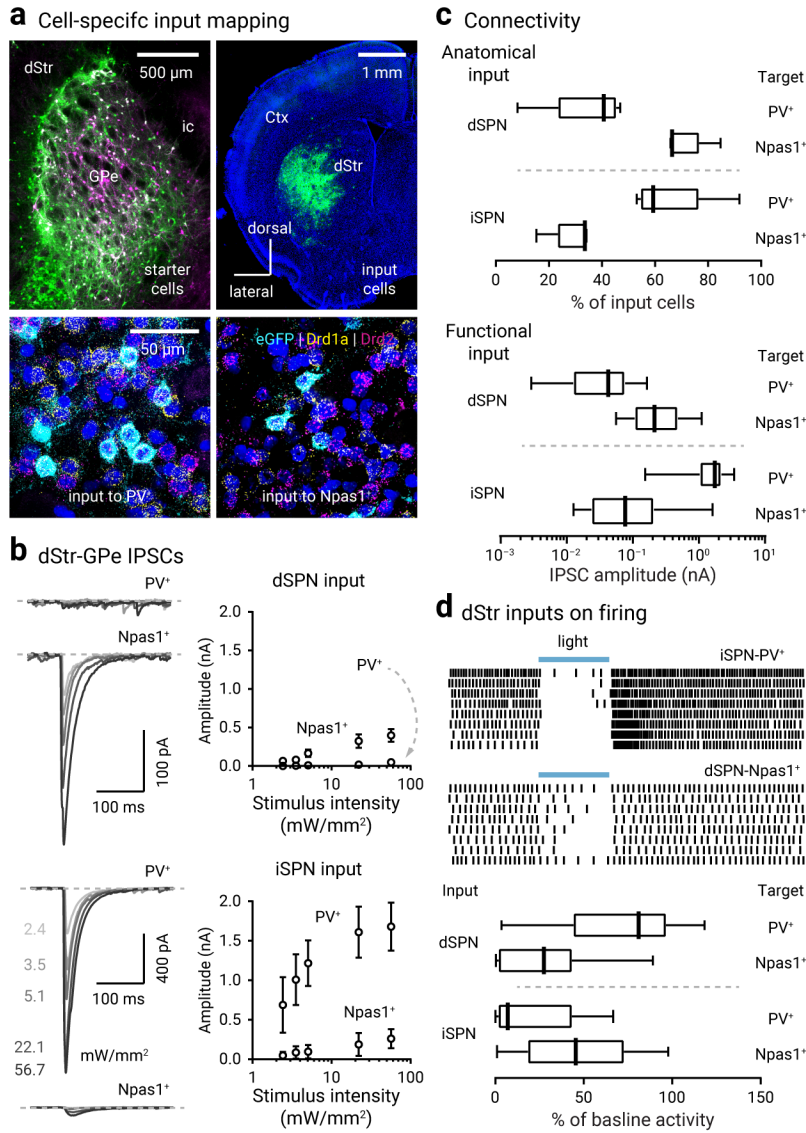

Figure 5

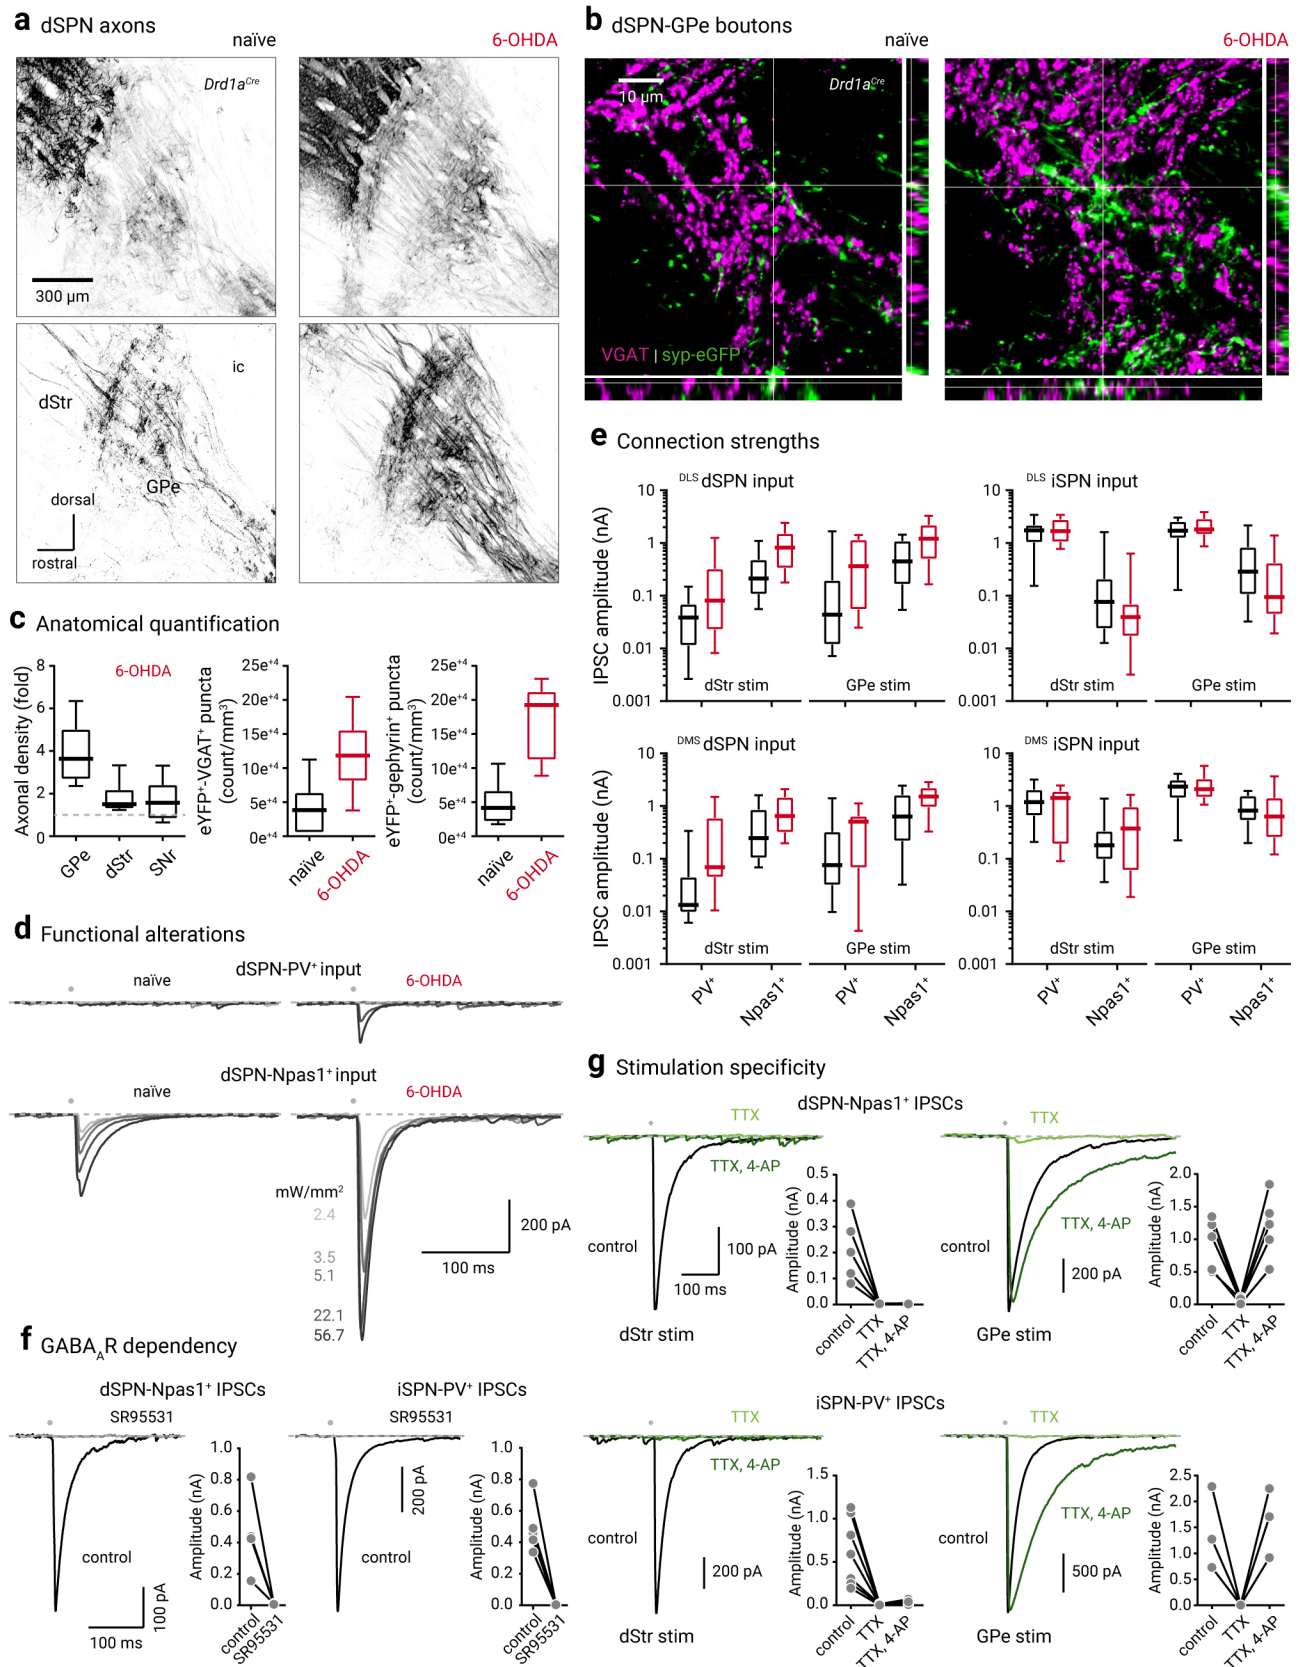

Figure 6

**Table 1. Primary antibodies used in this study.**

| Antigen     | Host species <sup>a</sup> | Clonality  | Source                                         | Catalog # | Working concentration | Dilution |
|-------------|---------------------------|------------|------------------------------------------------|-----------|-----------------------|----------|
| Cre         | Gp                        | Polyclonal | Synaptic Systems                               | 257004    |                       | 1:2,000  |
| RFP         | Rb                        | Polyclonal | Clontech                                       | 632496    | 1 µg/ml               | 1:500    |
| Enkephalin  | Rb                        | Polyclonal | Immunostar                                     | 20065     |                       | 1:200    |
| Gephyrin    | Ms                        | Monoclonal | Synaptic Systems                               | 147011    | 2 µg/ml               | 1:500    |
| GFP         | Ck                        | Polyclonal | Abcam                                          | ab13970   | 10 µg/ml              | 1:1,000  |
| Npas1       | Gp                        | Polyclonal | Chan Laboratory<br>(Hernandez et al.,<br>2015) |           |                       | 1:5,000  |
| Substance P | Rt                        | Monoclonal | Abcam                                          | ab7340    |                       | 1:200    |
| Substance P | Gp                        | Polyclonal | Abcam                                          | ab10353   |                       | 1:200    |
| tdTomato    | Rt                        | Monoclonal | Kerafast                                       | EST203    | 3.5 µg/ml             | 1:500    |
| VGAT        | Gp                        | Polyclonal | Synaptic Systems                               | 131004    |                       | 1:500    |

Notes:

<sup>a</sup> Abbreviations: chicken (Ck), guinea pig (Gp), mouse (Ms), rabbit (Rb), and rat (Rt).

**Table 2. Summary of optogenetic effects on behavior metrics.**

|                                    | DMS <sub>d</sub> SPNs, Chr2 ( <i>n</i> = 9) |              |             |                             | DMS <sub>i</sub> SPNs, Chr2 ( <i>n</i> = 11) |              |             |                |
|------------------------------------|---------------------------------------------|--------------|-------------|-----------------------------|----------------------------------------------|--------------|-------------|----------------|
|                                    | Pre                                         | Light        | Fold change | <i>P</i> value <sup>c</sup> | Pre                                          | Light        | Fold change | <i>P</i> value |
| Speed (cm/s)                       | 2.43 ± 0.60                                 | 4.12 ± 0.56  | 1.90 ± 0.25 | <b>0.0039</b>               | 2.47 ± 0.43                                  | 1.23 ± 0.19  | 0.52 ± 0.09 | <b>0.00098</b> |
| Body length-width ratio            | 2.34 ± 0.13                                 | 2.75 ± 0.15  | 1.14 ± 0.11 | <b>0.0039</b>               | 2.32 ± 0.19                                  | 2.16 ± 0.12  | 0.97 ± 0.04 | 0.083          |
| Total frequency <sup>a</sup>       | 35.33 ± 3.43                                | 24.30 ± 8.03 | 0.76 ± 0.16 | <b>0.0039</b>               | 36.40 ± 3.30                                 | 38.70 ± 2.70 | 1.12 ± 0.09 | 0.31           |
| Locomotion frequency               | 13.20 ± 0.66                                | 11.70 ± 2.63 | 0.91 ± 0.18 | 0.20                        | 14.60 ± 0.80                                 | 13.30 ± 0.55 | 0.90 ± 0.04 | <b>0.0098</b>  |
| Fine movement frequency            | 15.44 ± 2.24                                | 10.10 ± 4.57 | 0.82 ± 0.14 | <b>0.0039</b>               | 15.00 ± 0.75                                 | 15.70 ± 1.70 | 1.04 ± 0.08 | 0.81           |
| Rearing frequency                  | 1.40 ± 0.70                                 | 1.10 ± 0.70  | 0.97 ± 0.32 | 0.97                        | 1.10 ± 0.30                                  | 0.30 ± 0.20  | 0.29 ± 0.11 | <b>0.00098</b> |
| Motionless frequency               | 5.40 ± 1.60                                 | 1.50 ± 1.10  | 0.33 ± 0.14 | <b>0.0039</b>               | 5.00 ± 1.29                                  | 10.50 ± 1.75 | 1.88 ± 0.34 | <b>0.00098</b> |
| Locomotion % time                  | 42.80 ± 3.70                                | 59.90 ± 6.10 | 1.37 ± 0.12 | <b>0.0039</b>               | 49.60 ± 4.90                                 | 32.50 ± 4.80 | 0.66 ± 0.10 | <b>0.0029</b>  |
| Fine movement % time               | 26.78 ± 3.92                                | 16.80 ± 7.87 | 0.79 ± 0.13 | <b>0.0039</b>               | 28.93 ± 3.07                                 | 27.90 ± 5.60 | 1.03 ± 0.08 | 0.64           |
| Rearing % time                     | 15.70 ± 6.70                                | 13.40 ± 8.40 | 1.11 ± 0.57 | 0.65                        | 12.60 ± 5.90                                 | 3.70 ± 3.40  | 0.39 ± 0.18 | <b>0.00098</b> |
| Motionless % time                  | 10.20 ± 2.60                                | 1.80 ± 1.65  | 0.18 ± 0.10 | <b>0.0039</b>               | 12.50 ± 1.00                                 | 32.30 ± 5.40 | 2.84 ± 0.34 | <b>0.00098</b> |
| Locomotion duration <sup>b</sup>   | 0.34 ± 0.03                                 | 0.60 ± 0.14  | 1.70 ± 0.41 | <b>0.0039</b>               | 0.34 ± 0.05                                  | 0.34 ± 0.07  | 0.95 ± 0.23 | 0.21           |
| Fine movement duration             | 0.18 ± 0.01                                 | 0.16 ± 0.01  | 0.93 ± 0.07 | <b>0.027</b>                | 0.18 ± 0.01                                  | 0.17 ± 0.01  | 0.94 ± 0.05 | <b>0.019</b>   |
| Rearing duration                   | 1.16 ± 0.07                                 | 1.01 ± 0.30  | 0.84 ± 0.29 | 0.82                        | 0.96 ± 0.11                                  | 0.88 ± 0.35  | 1.28 ± 0.56 | 0.43           |
| Motionless duration                | 0.20 ± 0.13                                 | 0.11 ± 0.01  | 0.61 ± 0.08 | <b>0.0039</b>               | 0.19 ± 0.03                                  | 0.30 ± 0.07  | 1.67 ± 0.32 | <b>0.0020</b>  |
| Locomotion-fine movement frequency | 10.70 ± 9.73                                | 9.30 ± 8.33  | 1.01 ± 0.24 | 0.50                        | 11.79 ± 11.24                                | 9.10 ± 8.38  | 0.72 ± 0.13 | <b>0.0020</b>  |
| Locomotion-rearing frequency       | 1.50 ± 0.28                                 | 1.58 ± 0.18  | 1.14 ± 0.13 | 0.31                        | 1.43 ± 0.32                                  | 1.00 ± 0.00  | 0.57 ± 0.29 | <b>0.031</b>   |
| Locomotion-motionless frequency    | 2.00 ± 0.43                                 | 1.20 ± 0.20  | 0.77 ± 0.06 | <b>0.0039</b>               | 2.09 ± 0.42                                  | 2.89 ± 0.51  | 1.38 ± 0.35 | <b>0.0088</b>  |
| Fine movement-locomotion frequency | 10.22 ± 0.63                                | 9.20 ± 3.24  | 1.02 ± 0.30 | 0.48                        | 11.70 ± 0.77                                 | 9.40 ± 2.65  | 0.80 ± 0.12 | <b>0.0020</b>  |
| Fine movement-rearing frequency    | 1.00 ± 0.17                                 | 1.00 ± 0.00  | 0.86 ± 0.46 | 0.44                        | 1.00 ± 0.00                                  | 0.00 ± 0.00  | 0.00 ± 0.00 | > 0.99         |
| Fine movement-motionless frequency | 3.67 ± 1.13                                 | 2.00 ± 0.90  | 0.45 ± 0.11 | <b>0.0039</b>               | 4.13 ± 0.75                                  | 6.75 ± 1.00  | 1.56 ± 0.36 | <b>0.00098</b> |
| Rearing-locomotion frequency       | 1.67 ± 0.33                                 | 1.43 ± 0.29  | 1.07 ± 0.18 | 0.81                        | 1.50 ± 0.13                                  | 1.00 ± 0.00  | 0.67 ± 0.17 | <b>0.0078</b>  |
| Rearing-fine movement frequency    | 1.00 ± 0.00                                 | 1.00 ± 0.00  | 1.00 ± 0.14 | 0.63                        | 1.00 ± 0.33                                  | 1.00 ± 0.00  | 1.00 ± 0.33 | > 0.99         |
| Motionless-locomotion frequency    | 2.17 ± 0.37                                 | 1.40 ± 0.40  | 0.71 ± 0.07 | <b>0.0078</b>               | 2.17 ± 0.29                                  | 2.60 ± 0.35  | 1.42 ± 0.27 | <b>0.0059</b>  |
| Motionless-fine movement frequency | 4.13 ± 1.03                                 | 1.75 ± 0.75  | 0.43 ± 0.11 | <b>0.0039</b>               | 4.67 ± 1.17                                  | 6.29 ± 1.17  | 1.67 ± 0.35 | <b>0.00098</b> |

|                                    | DLS <sup>a</sup> dSPNs, ChR2 ( <i>n</i> = 13) |               |             |                | DLS <sup>a</sup> iSPNs, ChR2 ( <i>n</i> = 15) |              |             |                |
|------------------------------------|-----------------------------------------------|---------------|-------------|----------------|-----------------------------------------------|--------------|-------------|----------------|
|                                    | Pre                                           | Light         | Fold change | <i>P</i> value | Pre                                           | Light        | Fold change | <i>P</i> value |
| Speed (cm/s)                       | 3.04 ± 0.92                                   | 1.32 ± 0.44   | 0.59 ± 0.34 | <b>0.0061</b>  | 2.75 ± 0.32                                   | 3.80 ± 0.65  | 1.35 ± 0.30 | <b>0.0012</b>  |
| Body length-width ratio            | 2.54 ± 0.14                                   | 2.46 ± 0.12   | 1.01 ± 0.06 | 0.84           | 2.39 ± 0.15                                   | 2.52 ± 0.11  | 1.06 ± 0.06 | <b>0.035</b>   |
| Total frequency                    | 32.20 ± 6.40                                  | 37.80 ± 5.33  | 1.13 ± 0.15 | 0.057          | 35.20 ± 3.87                                  | 27.85 ± 3.25 | 0.85 ± 0.12 | <b>0.0081</b>  |
| Locomotion frequency               | 13.25 ± 1.42                                  | 15.53 ± 1.55  | 1.17 ± 0.11 | <b>0.0024</b>  | 14.17 ± 2.28                                  | 10.22 ± 0.81 | 0.72 ± 0.11 | <b>0.00085</b> |
| Fine movement frequency            | 13.92 ± 2.88                                  | 16.70 ± 2.10  | 1.18 ± 0.20 | <b>0.017</b>   | 14.31 ± 1.61                                  | 11.15 ± 1.60 | 0.80 ± 0.12 | <b>0.00085</b> |
| Rearing frequency                  | 1.40 ± 0.32                                   | 0.70 ± 0.37   | 0.50 ± 0.31 | <b>0.0081</b>  | 1.80 ± 0.45                                   | 1.17 ± 0.61  | 0.90 ± 0.43 | 0.61           |
| Motionless frequency               | 3.70 ± 1.40                                   | 4.50 ± 0.75   | 1.16 ± 0.45 | 0.72           | 3.07 ± 0.90                                   | 5.62 ± 1.85  | 1.45 ± 0.55 | <b>0.027</b>   |
| Locomotion % time                  | 48.40 ± 7.47                                  | 45.00 ± 5.00  | 1.03 ± 0.13 | 0.84           | 49.43 ± 4.07                                  | 49.92 ± 9.12 | 0.99 ± 0.16 | 0.92           |
| Fine movement % time               | 24.83 ± 6.42                                  | 32.30 ± 8.40  | 1.17 ± 0.24 | <b>0.021</b>   | 26.38 ± 4.62                                  | 18.77 ± 3.21 | 0.75 ± 0.08 | <b>0.00085</b> |
| Rearing % time                     | 17.30 ± 4.01                                  | 10.75 ± 6.55  | 0.78 ± 0.26 | 0.057          | 17.10 ± 7.56                                  | 11.77 ± 6.19 | 0.96 ± 0.53 | 0.36           |
| Motionless % time                  | 6.08 ± 3.42                                   | 6.70 ± 1.60   | 0.90 ± 0.51 | 0.49           | 4.79 ± 1.37                                   | 12.38 ± 8.28 | 2.01 ± 1.10 | <b>0.0051</b>  |
| Locomotion duration                | 0.38 ± 0.08                                   | 0.32 ± 0.07   | 0.86 ± 0.20 | 0.13           | 0.38 ± 0.05                                   | 0.51 ± 0.10  | 1.18 ± 0.20 | <b>0.00031</b> |
| Fine movement duration             | 0.17 ± 0.01                                   | 0.18 ± 0.01   | 1.02 ± 0.10 | 0.22           | 0.17 ± 0.01                                   | 0.16 ± 0.01  | 0.91 ± 0.06 | 0.095          |
| Rearing duration                   | 1.21 ± 0.11                                   | 1.48 ± 0.28   | 1.10 ± 0.22 | 0.11           | 1.03 ± 0.23                                   | 0.98 ± 0.18  | 0.90 ± 0.32 | 0.22           |
| Motionless duration                | 0.18 ± 0.02                                   | 0.13 ± 0.01   | 0.73 ± 0.14 | <b>0.00073</b> | 0.15 ± 0.02                                   | 0.24 ± 0.07  | 1.42 ± 0.43 | <b>0.0026</b>  |
| Locomotion-fine movement frequency | 10.80 ± 9.72                                  | 12.58 ± 11.46 | 1.26 ± 0.11 | <b>0.00098</b> | 11.70 ± 10.96                                 | 6.46 ± 5.93  | 0.62 ± 0.12 | <b>0.00043</b> |
| Locomotion-rearing frequency       | 1.50 ± 0.20                                   | 1.40 ± 0.40   | 0.97 ± 0.17 | 0.75           | 1.43 ± 0.26                                   | 1.33 ± 0.33  | 1.00 ± 0.25 | 0.81           |
| Locomotion-motionless frequency    | 1.70 ± 0.27                                   | 2.14 ± 0.46   | 1.25 ± 0.31 | 0.13           | 2.00 ± 0.33                                   | 2.08 ± 0.50  | 1.08 ± 0.25 | 0.22           |
| Fine movement-locomotion frequency | 10.60 ± 1.15                                  | 12.90 ± 1.33  | 1.28 ± 0.17 | <b>0.00024</b> | 11.64 ± 1.94                                  | 6.38 ± 1.08  | 0.62 ± 0.12 | <b>0.00037</b> |
| Fine movement-rearing frequency    | 1.00 ± 0.00                                   | 1.00 ± 0.00   | 0.88 ± 0.21 | 0.88           | 1.33 ± 0.33                                   | 1.00 ± 0.25  | 0.77 ± 0.23 | 0.07           |
| Fine movement-motionless frequency | 3.63 ± 1.10                                   | 4.00 ± 1.00   | 1.03 ± 0.41 | 0.79           | 2.80 ± 0.63                                   | 3.45 ± 1.31  | 1.42 ± 0.35 | <b>0.035</b>   |
| Rearing-locomotion frequency       | 1.33 ± 0.17                                   | 1.00 ± 0.00   | 0.89 ± 0.14 | 0.12           | 1.50 ± 0.35                                   | 1.43 ± 0.24  | 1.00 ± 0.25 | 0.78           |
| Rearing-fine movement frequency    | 1.00 ± 0.00                                   | 1.00 ± 0.00   | 1.00 ± 0.20 | 0.81           | 1.00 ± 0.00                                   | 1.00 ± 0.00  | 1.00 ± 0.06 | 0.88           |
| Motionless-locomotion frequency    | 2.15 ± 0.35                                   | 2.20 ± 0.20   | 1.04 ± 0.25 | 0.64           | 1.86 ± 0.36                                   | 2.00 ± 0.50  | 1.11 ± 0.16 | 0.2            |
| Motionless-fine movement frequency | 3.20 ± 0.76                                   | 4.38 ± 0.88   | 1.36 ± 0.68 | 0.3            | 2.75 ± 0.58                                   | 3.36 ± 1.30  | 1.39 ± 0.50 | 0.12           |

Notes:

<sup>a</sup> Unit for all frequencies is count/10 s.

<sup>b</sup> Unit for all durations is seconds.

<sup>c</sup> Wilcoxon test; two-tailed exact *P* values are shown. *P* < 0.05 are shown in bold.



**Table 3. Input-output relationship of DLS inputs in naïve and 6-OHDA lesioned mice.**

| Input & stimulus location | Stimulus intensity (mW/mm <sup>2</sup> ) | IPSC peak amplitude (pA) |                       |                          |          |                        |          |                           |          | Statistical analyses <sup>b</sup>                 |                                                 |                                                       |                                                     |
|---------------------------|------------------------------------------|--------------------------|-----------------------|--------------------------|----------|------------------------|----------|---------------------------|----------|---------------------------------------------------|-------------------------------------------------|-------------------------------------------------------|-----------------------------------------------------|
|                           |                                          | naïve PV <sup>+</sup>    |                       | naïve Npas1 <sup>+</sup> |          | 6-OHDA PV <sup>+</sup> |          | 6-OHDA Npas1 <sup>+</sup> |          | naïve PV <sup>+</sup> vs naïve Npas1 <sup>+</sup> | naïve PV <sup>+</sup> vs 6-OHDA PV <sup>+</sup> | naïve Npas1 <sup>+</sup> vs 6-OHDA Npas1 <sup>+</sup> | 6-OHDA PV <sup>+</sup> vs 6-OHDA Npas1 <sup>+</sup> |
|                           |                                          | Median ± MAD             | <i>n</i> <sup>a</sup> | Median ± MAD             | <i>n</i> | Median ± MAD           | <i>n</i> | Median ± MAD              | <i>n</i> |                                                   |                                                 |                                                       |                                                     |
| dSPN, dStr                | 2.4                                      | 0.0 ± 0.0                | 4                     | 22.7 ± 22.7              | 11       | 2.0 ± 2.0              | 10       | 324.2 ± 290.8             | 11       | 0.078                                             | 0.27                                            | <b>0.0052</b>                                         | <b>0.0046</b>                                       |
|                           | 3.5                                      | 2.1 ± 2.1                | 5                     | 33.7 ± 33.7              | 12       | 5.6 ± 5.6              | 12       | 271.1 ± 255.5             | 12       | 0.076                                             | 0.48                                            | <b>0.0044</b>                                         | <b>0.0035</b>                                       |
|                           | 5.1                                      | 8.1 ± 6.2                | 6                     | 79.1 ± 59.5              | 17       | 10.5 ± 10.5            | 13       | 375.5 ± 305.5             | 13       | <b>0.00014</b>                                    | 0.62                                            | <b>0.017</b>                                          | <b>0.0050</b>                                       |
|                           | 22.1                                     | 7.7 ± 3.5                | 8                     | 158.3 ± 125.0            | 18       | 55.4 ± 54.1            | 13       | 866.3 ± 537.5             | 13       | <b>&lt; 0.0001</b>                                | <b>0.037</b>                                    | <b>0.0095</b>                                         | <b>0.0051</b>                                       |
|                           | 56.7                                     | 38.5 ± 29.3              | 8                     | 213.8 ± 122.0            | 28       | 81.0 ± 76.7            | 13       | 815.8 ± 530.5             | 15       | <b>0.00011</b>                                    | 0.14                                            | <b>0.0017</b>                                         | <b>0.0015</b>                                       |
| dSPN, GPe                 | 2.1                                      | 15.7 ± 12.6              | 12                    | 182.7 ± 170.1            | 20       | 120.0 ± 102.1          | 11       | 527.7 ± 447.2             | 23       | <b>0.012</b>                                      | 0.051                                           | <b>0.039</b>                                          | <b>0.042</b>                                        |
|                           | 3.5                                      | 43.9 ± 36.3              | 12                    | 448.4 ± 371.0            | 20       | 364.7 ± 310.1          | 11       | 1,208.7 ± 818.2           | 23       | <b>0.0031</b>                                     | <b>0.044</b>                                    | <b>0.013</b>                                          | <b>0.0075</b>                                       |
| iSPN, dStr                | 2.4                                      | 295.0 ± 253.8            | 6                     | 0.0 ± 0.0                | 13       | 578.9 ± 503.9          | 10       | 4.3 ± 4.3                 | 6        | <b>0.00085</b>                                    | 0.79                                            | 0.34                                                  | <b>0.023</b>                                        |
|                           | 3.5                                      | 761.7 ± 439.2            | 8                     | 0.0 ± 0.0                | 14       | 819.5 ± 667.0          | 13       | 17.1 ± 17.1               | 7        | <b>0.00041</b>                                    | 0.86                                            | 0.32                                                  | <b>0.0011</b>                                       |
|                           | 5.1                                      | 969.2 ± 546.4            | 10                    | 8.6 ± 7.7                | 15       | 891.6 ± 544.2          | 14       | 12.7 ± 5.6                | 8        | <b>0.00022</b>                                    | 0.71                                            | 0.40                                                  | <b>0.00028</b>                                      |
|                           | 22.1                                     | 1,593.1 ± 682.9          | 11                    | 30.0 ± 23.1              | 14       | 1,355.1 ± 713.5        | 16       | 29.8 ± 19.2               | 10       | <b>0.00052</b>                                    | 0.75                                            | 0.80                                                  | <b>&lt; 0.0001</b>                                  |
|                           | 56.7                                     | 1,740.7 ± 627.7          | 12                    | 76.9 ± 60.9              | 20       | 1,682.0 ± 820.4        | 18       | 39.2 ± 22.2               | 11       | <b>&lt; 0.0001</b>                                | 0.75                                            | 0.36                                                  | <b>&lt; 0.0001</b>                                  |
| iSPN, GPe                 | 2.1                                      | 1,495.6 ± 440.9          | 16                    | 103.4 ± 74.6             | 16       | 1,705.2 ± 480.2        | 16       | 57.8 ± 43.9               | 15       | <b>0.0034</b>                                     | 0.24                                            | 0.13                                                  | <b>&lt; 0.0001</b>                                  |
|                           | 3.5                                      | 1,715.2 ± 691.9          | 16                    | 288.0 ± 212.9            | 17       | 1,806.1 ± 689.2        | 16       | 94.5 ± 84.0               | 15       | <b>0.0016</b>                                     | 0.36                                            | 0.19                                                  | <b>&lt; 0.0001</b>                                  |

Notes:

<sup>a</sup> Sample size (*n*) only included cells that responded to maximal stimulus intensity.

<sup>b</sup> Mann-Whitney *U* test; two-tailed exact *P* values were shown. *P* < 0.05 were shown in bold.



**Table 4. Input-output relationship of DMS inputs in naïve and 6-OHDA lesioned mice.**

| Input & stimulus location | Stimulus intensity (mW/mm <sup>2</sup> ) | IPSC peak amplitude (pA) |                       |                          |          |                        |          |                           |          | Statistical analyses <sup>b</sup>                 |                                                 |                                                       |                                                     |
|---------------------------|------------------------------------------|--------------------------|-----------------------|--------------------------|----------|------------------------|----------|---------------------------|----------|---------------------------------------------------|-------------------------------------------------|-------------------------------------------------------|-----------------------------------------------------|
|                           |                                          | naïve PV <sup>+</sup>    |                       | naïve Npas1 <sup>+</sup> |          | 6-OHDA PV <sup>+</sup> |          | 6-OHDA Npas1 <sup>+</sup> |          | naïve PV <sup>+</sup> vs naïve Npas1 <sup>+</sup> | naïve PV <sup>+</sup> vs 6-OHDA PV <sup>+</sup> | naïve Npas1 <sup>+</sup> vs 6-OHDA Npas1 <sup>+</sup> | 6-OHDA PV <sup>+</sup> vs 6-OHDA Npas1 <sup>+</sup> |
|                           |                                          | Median ± MAD             | <i>n</i> <sup>a</sup> | Median ± MAD             | <i>n</i> | Median ± MAD           | <i>n</i> | Median ± MAD              | <i>n</i> |                                                   |                                                 |                                                       |                                                     |
| dSPN, dStr                | 2.4                                      | 8.5 ± 8.5                | 8                     | 16.2 ± 16.2              | 15       | 16.3 ± 16.3            | 14       | 109.5 ± 107.4             | 20       | 0.17                                              | 0.53                                            | 0.23                                                  | <b>0.012</b>                                        |
|                           | 3.5                                      | 3.8 ± 3.8                | 7                     | 17.3 ± 17.3              | 18       | 37.1 ± 32.8            | 14       | 88.6 ± 84.9               | 21       | 0.18                                              | 0.22                                            | 0.068                                                 | <b>0.047</b>                                        |
|                           | 5.1                                      | 5.9 ± 4.6                | 12                    | 48.7 ± 46.2              | 18       | 35.4 ± 28.7            | 15       | 144.3 ± 124.7             | 27       | <b>0.021</b>                                      | <b>0.046</b>                                    | 0.052                                                 | <b>0.0019</b>                                       |
|                           | 22.1                                     | 11.2 ± 7.7               | 14                    | 123.0 ± 91.2             | 22       | 87.7 ± 74.2            | 15       | 498.5 ± 289.9             | 27       | <b>0.00051</b>                                    | <b>0.0079</b>                                   | <b>0.0019</b>                                         | <b>0.00053</b>                                      |
|                           | 56.7                                     | 13.3 ± 6.5               | 16                    | 246.2 ± 156.7            | 23       | 69.1 ± 56.0            | 16       | 649.7 ± 396.5             | 27       | <b>&lt; 0.0001</b>                                | <b>0.0085</b>                                   | <b>0.0093</b>                                         | <b>0.00044</b>                                      |
| dSPN, GPe                 | 2.1                                      | 33.8 ± 28.2              | 17                    | 469.5 ± 334.9            | 21       | 272.2 ± 261.7          | 19       | 1,138.4 ± 664.5           | 27       | <b>0.0013</b>                                     | 0.17                                            | <b>0.030</b>                                          | <b>&lt; 0.0001</b>                                  |
|                           | 3.5                                      | 75.7 ± 64.7              | 17                    | 635.6 ± 551.0            | 19       | 507.1 ± 384.7          | 17       | 1,518.0 ± 685.4           | 24       | <b>0.0048</b>                                     | 0.25                                            | <b>0.033</b>                                          | <b>&lt; 0.0001</b>                                  |
| iSPN, dStr                | 2.4                                      | 14.5 ± 13.2              | 19                    | 23.5 ± 23.5              | 19       | 31.3 ± 29.3            | 11       | 28.5 ± 28.3               | 16       | 0.74                                              | 0.66                                            | 0.68                                                  | 0.58                                                |
|                           | 3.5                                      | 11.9 ± 11.4              | 22                    | 34.2 ± 31.8              | 20       | 236.5 ± 216.5          | 18       | 31.6 ± 31.6               | 19       | 0.76                                              | <b>0.011</b>                                    | 0.88                                                  | <b>0.031</b>                                        |
|                           | 5.1                                      | 43.4 ± 39.6              | 22                    | 36.6 ± 35.2              | 20       | 282.0 ± 271.5          | 22       | 62.7 ± 42.9               | 17       | 0.42                                              | 0.16                                            | 0.56                                                  | 0.11                                                |
|                           | 22.1                                     | 674.9 ± 548.4            | 25                    | 136.1 ± 95.6             | 23       | 1,009.3 ± 864.9        | 24       | 193.7 ± 172.0             | 19       | <b>0.016</b>                                      | 0.41                                            | 0.35                                                  | <b>0.038</b>                                        |
|                           | 56.7                                     | 1,191.7 ± 640.5          | 25                    | 179.8 ± 89.5             | 24       | 1,433.9 ± 890.2        | 25       | 376.5 ± 339.4             | 20       | <b>&lt; 0.0001</b>                                | 0.51                                            | 0.52                                                  | <b>0.021</b>                                        |
| iSPN, GPe                 | 2.1                                      | 2,185.5 ± 819.1          | 40                    | 625.0 ± 459.1            | 24       | 1,889.3 ± 999.3        | 25       | 506.5 ± 410.5             | 19       | <b>&lt; 0.0001</b>                                | 0.84                                            | 0.78                                                  | <b>0.0011</b>                                       |
|                           | 3.5                                      | 2,340.6 ± 849.7          | 41                    | 823.0 ± 442.4            | 25       | 2,098.5 ± 727.5        | 25       | 635.5 ± 417.9             | 17       | <b>&lt; 0.0001</b>                                | 0.83                                            | 0.46                                                  | <b>0.00025</b>                                      |

Notes:

<sup>a</sup> Sample size (*n*) only included cells that responded to maximal stimulus intensity.

<sup>b</sup> Mann-Whitney *U* test; two-tailed exact *P* values were shown. *P* < 0.05 were shown in bold.

**Table 5. Response rate to discrete dStr inputs in naïve and 6-OHDA lesioned mice.**

| Input               | Stimulus location | Stimulus intensity (mW/mm <sup>2</sup> ) | Percentage of responders (%) |                       |                          |          |                        |          |                           |          | Statistical analyses <sup>b</sup>                 |                                                 |                                                       |                                                     |
|---------------------|-------------------|------------------------------------------|------------------------------|-----------------------|--------------------------|----------|------------------------|----------|---------------------------|----------|---------------------------------------------------|-------------------------------------------------|-------------------------------------------------------|-----------------------------------------------------|
|                     |                   |                                          | naïve PV <sup>+</sup>        |                       | naïve Npas1 <sup>+</sup> |          | 6-OHDA PV <sup>+</sup> |          | 6-OHDA Npas1 <sup>+</sup> |          | naïve PV <sup>+</sup> vs naïve Npas1 <sup>+</sup> | naïve PV <sup>+</sup> vs 6-OHDA PV <sup>+</sup> | naïve Npas1 <sup>+</sup> vs 6-OHDA Npas1 <sup>+</sup> | 6-OHDA PV <sup>+</sup> vs 6-OHDA Npas1 <sup>+</sup> |
|                     |                   |                                          | %                            | <i>n</i> <sup>a</sup> | %                        | <i>n</i> | %                      | <i>n</i> | %                         | <i>n</i> |                                                   |                                                 |                                                       |                                                     |
| DLS <sub>dSPN</sub> | dStr              | 56.7                                     | 44.4                         | 18                    | 93.8                     | 32       | 86.7                   | 15       | 100                       | 15       | <b>0.00019</b>                                    | <b>0.027</b>                                    | > 0.99                                                | 0.48                                                |
|                     | GPe               | 3.5                                      | 70.6                         | 17                    | 95.2                     | 21       | 91.7                   | 12       | 100                       | 18       | 0.071                                             | 0.35                                            | > 0.99                                                | 0.40                                                |
| DLS <sub>iSPN</sub> | dStr              | 56.7                                     | 92.9                         | 14                    | 90.9                     | 22       | 100                    | 18       | 68.8                      | 16       | > 0.99                                            | 0.44                                            | 0.11                                                  | <b>0.016</b>                                        |
|                     | GPe               | 3.5                                      | 100                          | 9                     | 94.4                     | 18       | 100                    | 16       | 100                       | 15       | > 0.99                                            | > 0.99                                          | > 0.99                                                | > 0.99                                              |
| DMS <sub>dSPN</sub> | dStr              | 56.7                                     | 76.2                         | 21                    | 100                      | 24       | 61.5                   | 26       | 100                       | 30       | <b>0.017</b>                                      | 0.35                                            | > 0.99                                                | <b>0.00015</b>                                      |
|                     | GPe               | 3.5                                      | 94.4                         | 18                    | 100                      | 21       | 95                     | 20       | 100                       | 28       | 0.46                                              | > 0.99                                          | > 0.99                                                | 0.42                                                |
| DMS <sub>iSPN</sub> | dStr              | 56.7                                     | 100                          | 25                    | 89.7                     | 29       | 100                    | 26       | 96.2                      | 26       | 0.24                                              | > 0.99                                          | 0.61                                                  | > 0.99                                              |
|                     | GPe               | 3.5                                      | 100                          | 41                    | 100                      | 25       | 100                    | 25       | 100                       | 19       | > 0.99                                            | > 0.99                                          | > 0.99                                                | > 0.99                                              |

Notes:

<sup>a</sup> Sample size (*n*) included all cells with or without responses.

<sup>b</sup> Fisher's exact test; two-tailed exact *P* values were shown. *P* < 0.05 were shown in bold.
